# Supplementary material for: Genome editing in the unicellular holozoan Capsaspora owczarzaki suggests a premetazoan role for the Hippo pathway in multicellular morphogenesis
Source: eLife. 2022 Jun 6;11:e77598. doi: 10.7554/eLife.77598 (PMC9170242; doi:10.7554/eLife.77598)
Supplement: Supplementary file 1. [file elife-77598-supp1.xlsx]

## Sheet: Sheet1
GENE_NAME	WT-VS-yki-/-.logFC	WT -VS-yki -/- Filo.FDR
CAOG_04854	-2.9171	2.36355e-101
CAOG_03089	-2.87544	1.61952e-13
CAOG_06566	-2.78318	1.15332e-88
CAOG_06808	-2.64773	4.73066e-24
CAOG_03163	-2.56486	1.84666e-61
CAOG_01263	-2.55086	5.45574e-55
CAOG_00060	-2.49401	5.44112e-16
CAOG_05669	-2.33143	1.95225e-17
CAOG_00286	-2.32898	7.50889e-35
CAOG_00061	-2.2488	6.96542e-54
CAOG_08983	-2.10469	5.61572e-11
CAOG_03619	-1.99357	6.51553e-51
CAOG_06430	-1.9843	3.23023e-16
CAOG_07730	-1.97979	1.01181e-06
CAOG_06642	-1.97045	0.000858782
CAOG_03274	-1.96569	2.86481e-20
CAOG_02797	-1.955	1.49335e-20
CAOG_00660	-1.89674	2.5451e-12
CAOG_03735	-1.86125	3.2107e-18
CAOG_05403	-1.84263	2.78551e-18
CAOG_05015	-1.8087	1.61829e-21
CAOG_06994	-1.72874	4.19503e-20
CAOG_02294	-1.72734	1.93682e-23
CAOG_08468	-1.72257	2.92635e-09
CAOG_00219	-1.59688	4.0549e-26
CAOG_07972	-1.58904	2.47807e-14
CAOG_07227	-1.58019	1.62468e-28
CAOG_03167	-1.56862	0.000377802
CAOG_08050	-1.55355	3.77313e-12
CAOG_06571	-1.55232	3.96193e-06
CAOG_07866	-1.46507	2.40815e-05
CAOG_03082	-1.46114	1.02765e-05
CAOG_06555	-1.44845	0.000280017
CAOG_06421	-1.43045	3.15752e-11
CAOG_03025	-1.42816	8.14591e-14
CAOG_05404	-1.41646	1.40093e-14
CAOG_00888	-1.40604	5.38906e-13
CAOG_08863	-1.37057	0.000815157
CAOG_03219	-1.36838	5.98717e-10
CAOG_00147	-1.36657	2.59618e-11
CAOG_06428	-1.36046	2.4609e-06
CAOG_03091	-1.35937	3.8169e-13
CAOG_08537	-1.34073	8.14881e-05
CAOG_06504	-1.32073	7.15126e-07
CAOG_00239	-1.3192	6.73632e-05
CAOG_00066	-1.31806	6.17904e-10
CAOG_03947	-1.31413	3.14922e-13
CAOG_08228	-1.30058	4.07244e-13
CAOG_05007	-1.29722	7.68519e-11
CAOG_04930	-1.29226	0.00359028
CAOG_08320	-1.29115	0.00190143
CAOG_02793	-1.26405	4.11587e-17
CAOG_05386	-1.25595	0.000202966
CAOG_02087	-1.24042	0.000134689
CAOG_05350	-1.23765	2.10734e-12
CAOG_03353	-1.23499	4.99149e-15
CAOG_08435	-1.2311	2.17542e-21
CAOG_00838	-1.2085	4.67811e-16
CAOG_03846	-1.20575	2.32973e-18
CAOG_08714	-1.20541	1.38968e-08
CAOG_03806	-1.20002	5.24102e-15
CAOG_02697	-1.19674	7.45393e-08
CAOG_01088	-1.19573	8.50446e-11
CAOG_02955	-1.19046	1.61286e-09
CAOG_03522	-1.18445	0.000307908
CAOG_00454	-1.16817	8.67581e-07
CAOG_07318	-1.15925	2.44586e-08
CAOG_00493	-1.15791	4.12417e-13
CAOG_06936	-1.14771	9.40504e-10
CAOG_06675	-1.14722	1.1386e-12
CAOG_00779	-1.14684	2.25457e-15
CAOG_08948	-1.13352	3.54312e-05
CAOG_03878	-1.13022	2.60503e-15
CAOG_02509	-1.12954	2.45502e-16
CAOG_08471	-1.11396	0.00391866
CAOG_02330	-1.08313	4.66327e-08
CAOG_00827	-1.08199	1.04829e-07
CAOG_01731	-1.08048	1.26175e-10
CAOG_01087	-1.07812	0.000140769
CAOG_07622	-1.07663	1.26814e-06
CAOG_03194	-1.07345	2.40239e-17
CAOG_06334	-1.06939	0.0365257
CAOG_08321	-1.06923	0.00116628
CAOG_05163	-1.06385	1.35825e-06
CAOG_00165	-1.06161	6.85297e-12
CAOG_06125	-1.0598	0.00800071
CAOG_03887	-1.0333	7.20799e-15
CAOG_07786	-1.02917	4.10128e-10
CAOG_07593	-1.0213	0.0186822
CAOG_05169	-1.00892	1.56154e-06
CAOG_04990	-1.00636	9.32299e-13
CAOG_05173	-0.993757	8.07304e-11
CAOG_06570	-0.985527	1.34155e-12
CAOG_02483	-0.978263	0.0212471
CAOG_00029	-0.975243	3.82953e-06
CAOG_06785	-0.965598	0.00025843
CAOG_04909	-0.960219	3.75995e-07
CAOG_03424	-0.954827	4.7346e-07
CAOG_00238	-0.948609	3.98667e-13
CAOG_05316	-0.945118	1.1293e-08
CAOG_06379	-0.939204	0.00119827
CAOG_07145	-0.934585	1.33112e-07
CAOG_01752	-0.934301	4.25357e-05
CAOG_08791	-0.928965	2.93586e-05
CAOG_01882	-0.924046	2.26032e-05
CAOG_05724	-0.913645	5.03566e-06
CAOG_02942	-0.908709	3.86767e-12
CAOG_01785	-0.905783	9.71625e-06
CAOG_00182	-0.90437	7.40776e-06
CAOG_08654	-0.903218	0.02521
CAOG_08566	-0.899488	1.0219e-10
CAOG_08465	-0.892984	8.22935e-07
CAOG_03186	-0.888509	2.2997e-13
CAOG_01060	-0.885172	1.13614e-13
CAOG_08208	-0.883579	0.000276636
CAOG_07059	-0.882378	2.36793e-09
CAOG_01729	-0.878909	3.69381e-09
CAOG_07289	-0.876768	1.13653e-08
CAOG_00044	-0.876175	1.03693e-11
CAOG_03039	-0.875718	0.000129267
CAOG_03010	-0.875078	1.14538e-07
CAOG_07701	-0.873468	2.41657e-06
CAOG_05351	-0.871906	5.6034e-08
CAOG_06517	-0.868321	3.08495e-10
CAOG_06401	-0.865123	0.0369663
CAOG_03088	-0.859923	3.39674e-08
CAOG_07736	-0.858486	2.94962e-10
CAOG_06821	-0.857026	1.9974e-09
CAOG_00122	-0.85053	2.30511e-11
CAOG_07313	-0.845546	0.00142933
CAOG_08655	-0.843355	0.000997906
CAOG_06643	-0.841176	0.000236675
CAOG_02787	-0.839343	8.14881e-05
CAOG_01895	-0.836744	0.00033513
CAOG_01058	-0.835196	0.0309942
CAOG_02089	-0.834131	1.83999e-08
CAOG_07407	-0.832956	2.38312e-11
CAOG_05151	-0.83283	0.00279821
CAOG_02905	-0.8317	8.1155e-08
CAOG_07421	-0.831132	0.0010795
CAOG_07337	-0.829534	8.83446e-11
CAOG_03026	-0.8285	0.00407202
CAOG_00685	-0.826701	6.36013e-05
CAOG_03592	-0.826137	1.28344e-05
CAOG_03354	-0.82558	2.00138e-07
CAOG_02090	-0.824959	5.64206e-05
CAOG_06580	-0.824246	2.09478e-07
CAOG_01502	-0.824234	0.0267722
CAOG_02039	-0.823822	1.26883e-09
CAOG_00347	-0.822368	1.15362e-12
CAOG_01446	-0.821302	8.36942e-05
CAOG_01908	-0.8179	9.66417e-08
CAOG_00140	-0.8164	0.0199452
CAOG_07589	-0.813731	2.09922e-06
CAOG_02685	-0.809384	9.46842e-07
CAOG_07512	-0.798735	4.01534e-09
CAOG_02144	-0.795754	1.5079e-07
CAOG_01143	-0.795567	0.00610836
CAOG_06424	-0.795429	2.25809e-07
CAOG_00571	-0.788142	1.53764e-08
CAOG_01907	-0.787172	2.76401e-09
CAOG_03620	-0.786825	4.66183e-10
CAOG_01691	-0.786509	0.000307128
CAOG_08541	-0.783762	1.28684e-11
CAOG_03195	-0.781561	5.67835e-07
CAOG_08644	-0.77797	5.77734e-09
CAOG_03477	-0.770307	3.0754e-07
CAOG_05182	-0.769748	6.52011e-12
CAOG_05797	-0.768229	6.99506e-06
CAOG_05209	-0.759977	3.24317e-11
CAOG_04943	-0.753999	6.02303e-08
CAOG_06419	-0.75175	4.58902e-11
CAOG_03823	-0.751634	5.99873e-05
CAOG_01489	-0.751616	2.28408e-08
CAOG_01596	-0.748952	2.29018e-08
CAOG_04780	-0.747568	2.29811e-10
CAOG_02379	-0.746284	1.99038e-09
CAOG_08717	-0.746147	7.94198e-10
CAOG_03552	-0.745773	4.29811e-06
CAOG_03839	-0.743717	3.65264e-05
CAOG_00998	-0.742639	1.66532e-06
CAOG_03820	-0.742497	0.000262179
CAOG_07408	-0.741774	1.87168e-05
CAOG_01304	-0.740279	7.83451e-05
CAOG_04600	-0.738176	9.72078e-11
CAOG_09045	-0.733633	1.12892e-07
CAOG_01265	-0.73245	6.56658e-06
CAOG_03722	-0.728554	0.0326648
CAOG_05336	-0.728082	7.91649e-07
CAOG_02159	-0.726766	1.46537e-08
CAOG_05278	-0.726732	0.00921474
CAOG_02167	-0.726254	0.00110062
CAOG_04940	-0.721371	7.12763e-05
CAOG_01206	-0.720614	0.00763225
CAOG_03226	-0.719892	7.1402e-06
CAOG_01692	-0.714286	0.000670383
CAOG_01179	-0.712895	0.00015031
CAOG_01584	-0.712315	3.71365e-06
CAOG_02951	-0.70983	4.27889e-06
CAOG_08787	-0.708043	0.00248474
CAOG_02044	-0.704936	1.66299e-11
CAOG_01465	-0.701506	1.0668e-05
CAOG_07731	-0.701079	0.000373734
CAOG_02582	-0.698087	1.27569e-08
CAOG_07161	-0.69792	0.00320067
CAOG_00052	-0.697443	0.0212155
CAOG_07123	-0.695055	1.0901e-06
CAOG_06498	-0.693357	0.00123082
CAOG_02001	-0.69197	0.000361882
CAOG_06503	-0.690499	0.0199452
CAOG_02339	-0.689203	0.000165341
CAOG_01558	-0.688011	0.00018105
CAOG_03292	-0.68716	3.90839e-06
CAOG_00597	-0.686902	4.65394e-06
CAOG_04536	-0.686612	0.00999429
CAOG_07586	-0.68543	9.15196e-05
CAOG_03740	-0.681778	1.40973e-05
CAOG_03946	-0.680776	0.00153999
CAOG_00051	-0.676033	0.000406678
CAOG_05606	-0.675909	2.63701e-05
CAOG_00208	-0.674685	2.13271e-08
CAOG_07328	-0.674117	6.48861e-06
CAOG_02617	-0.673601	1.01234e-06
CAOG_04908	-0.671919	1.10383e-06
CAOG_05252	-0.67001	0.000161824
CAOG_05089	-0.668587	0.0408262
CAOG_03493	-0.664128	5.53722e-08
CAOG_06319	-0.663737	4.53637e-06
CAOG_03222	-0.662035	0.00759692
CAOG_05395	-0.657821	0.00385685
CAOG_04711	-0.657326	1.58907e-06
xanthine	-0.657199	0.000114036
CAOG_01000	-0.655029	1.16114e-05
CAOG_01632	-0.650024	0.000382829
CAOG_03568	-0.648971	6.38761e-05
CAOG_02255	-0.648307	2.00192e-07
CAOG_03160	-0.646712	3.85581e-07
CAOG_02860	-0.646537	0.00180645
CAOG_00451	-0.646484	0.00101399
CAOG_02070	-0.645699	0.000478701
CAOG_07657	-0.644257	4.8012e-06
CAOG_05733	-0.643489	0.00156668
hypothetical	-0.642466	0.000889861
CAOG_03162	-0.642206	4.22812e-06
CAOG_02327	-0.639931	4.02324e-06
CAOG_02248	-0.63841	2.14093e-07
CAOG_03516	-0.638224	3.91737e-05
CAOG_06706	-0.63754	9.80444e-06
CAOG_08408	-0.633813	3.0751e-05
CAOG_09183	-0.63366	0.000109085
CAOG_04365	-0.633657	0.0121902
CAOG_03762	-0.633597	1.05067e-06
CAOG_06753	-0.632651	5.45174e-06
CAOG_01445	-0.631573	0.0111801
CAOG_09137	-0.629997	1.35242e-05
CAOG_02714	-0.629978	3.41329e-06
CAOG_01057	-0.627175	3.6614e-06
CAOG_03095	-0.626246	0.000495292
CAOG_02853	-0.622033	1.71584e-05
CAOG_05390	-0.61946	0.00073405
CAOG_05060	-0.61891	0.000117308
CAOG_05815	-0.617834	3.20682e-06
CAOG_02573	-0.616999	2.46184e-05
CAOG_08572	-0.616963	0.000746657
CAOG_08880	-0.616747	0.0366052
CAOG_00919	-0.616473	3.50206e-05
CAOG_02785	-0.615266	1.0188e-05
CAOG_07760	-0.614747	0.00106468
CAOG_06350	-0.613698	1.93306e-05
CAOG_05073	-0.61356	6.91742e-06
CAOG_05117	-0.612357	2.37222e-07
CAOG_01009	-0.610755	3.58724e-06
CAOG_08413	-0.610651	2.4609e-06
CAOG_02153	-0.60963	0.000321577
CAOG_05465	-0.608272	0.000520913
CAOG_08251	-0.606022	0.00116303
CAOG_03466	-0.605772	3.59244e-05
CAOG_01182	-0.602963	2.39835e-07
CAOG_03100	-0.60213	3.22012e-05
CAOG_05406	-0.601587	0.00115102
CAOG_04651	-0.600832	0.0056068
CAOG_03886	-0.600587	1.64775e-05
CAOG_08869	-0.600048	1.80028e-07
CAOG_04699	-0.59952	0.000166937
CAOG_01376	-0.598339	1.3396e-07
CAOG_04544	-0.597198	0.0277715
CAOG_09124	-0.595087	0.0240777
CAOG_08564	-0.59506	0.00899417
CAOG_03434	-0.594855	0.00794582
CAOG_00398	-0.594681	0.0162377
CAOG_02369	-0.594292	0.00362713
CAOG_03174	-0.593671	6.87147e-05
CAOG_08551	-0.592253	9.87811e-06
CAOG_07079	-0.590577	8.35486e-05
CAOG_01842	-0.589814	0.000125577
CAOG_07428	-0.587957	0.00648051
CAOG_02663	-0.585442	3.50441e-05
CAOG_05543	-0.583067	0.000119537
CAOG_05095	-0.582821	0.000121869
CAOG_02542	-0.580173	1.2636e-05
CAOG_01092	-0.579157	0.043015
CAOG_08565	-0.576658	2.1597e-05
CAOG_07671	-0.575708	0.0037661
CAOG_04690	-0.575424	0.00653441
CAOG_06282	-0.574985	0.00613137
CAOG_00123	-0.574481	4.8907e-06
CAOG_02922	-0.574373	0.000829681
CAOG_05584	-0.572266	2.04232e-06
CAOG_01769	-0.571671	1.42332e-05
CAOG_00042	-0.569656	0.00254962
CAOG_05502	-0.567627	0.0212803
CAOG_00619	-0.563841	9.13006e-05
CAOG_02465	-0.563447	6.06611e-05
CAOG_08416	-0.56293	0.0328821
CAOG_04803	-0.562842	0.00055499
CAOG_02006	-0.562489	0.00239069
CAOG_06518	-0.561609	2.10276e-05
CAOG_06796	-0.559548	3.77281e-05
CAOG_02895	-0.559393	0.045685
CAOG_05279	-0.55927	0.00264051
CAOG_03695	-0.559203	0.0157712
CAOG_00135	-0.558899	0.00414712
CAOG_03675	-0.558331	0.00256323
CAOG_00878	-0.557449	7.4005e-05
CAOG_00767	-0.555636	0.0243447
CAOG_03770	-0.553976	0.0032282
CAOG_03919	-0.552922	1.0188e-05
CAOG_04556	-0.552138	0.00610995
CAOG_07022	-0.551275	0.00772258
CAOG_09010	-0.550591	0.00307415
CAOG_08481	-0.549967	5.99575e-05
CAOG_02005	-0.549718	0.00276702
CAOG_07424	-0.549511	5.91935e-05
CAOG_00929	-0.549454	1.18221e-05
CAOG_08027	-0.548342	0.000308981
CAOG_01712	-0.547856	2.8656e-06
CAOG_00988	-0.547692	0.00106315
CAOG_07821	-0.547205	0.00590011
CAOG_05108	-0.547142	0.00283568
CAOG_07594	-0.546158	0.00018902
CAOG_02931	-0.545703	0.000578049
CAOG_03277	-0.545023	0.000230323
CAOG_03471	-0.544032	0.000121869
CAOG_01355	-0.543918	0.00545024
CAOG_01920	-0.542991	7.6729e-06
CAOG_04810	-0.542167	0.00153999
CAOG_01932	-0.541596	0.000672527
CAOG_03063	-0.54157	3.82483e-06
CAOG_08212	-0.541423	0.00825471
CAOG_01543	-0.54089	5.85643e-05
CAOG_00006	-0.540324	0.00143826
CAOG_08661	-0.540174	1.15032e-05
CAOG_06983	-0.539649	0.000356372
CAOG_03581	-0.538039	0.000227424
CAOG_06228	-0.533133	7.17694e-06
CAOG_03538	-0.532427	0.000175285
CAOG_08523	-0.532347	0.000156942
CAOG_05094	-0.531037	0.00236383
CAOG_00772	-0.529175	4.40239e-06
CAOG_02572	-0.528223	0.0077673
CAOG_00711	-0.528167	0.0152317
CAOG_05017	-0.527034	0.02739
CAOG_05216	-0.526747	3.85014e-05
CAOG_07434	-0.526738	0.0483967
CAOG_00043	-0.526611	0.00110549
CAOG_03275	-0.52589	6.36013e-05
CAOG_00021	-0.524377	0.000296402
CAOG_06238	-0.524144	0.00207148
CAOG_02407	-0.523422	6.60162e-05
CAOG_08225	-0.523337	0.000296402
CAOG_07484	-0.523139	0.0022889
CAOG_00569	-0.522945	9.98298e-06
CAOG_00710	-0.522231	3.55193e-06
CAOG_05325	-0.521617	0.000532883
CAOG_01055	-0.519944	0.000108254
CAOG_04841	-0.518787	0.000810677
CAOG_08739	-0.518747	0.000251209
CAOG_06368	-0.518604	0.00185517
CAOG_00059	-0.516937	0.00108048
CAOG_03698	-0.516654	2.7573e-06
CAOG_02020	-0.51665	0.00115102
CAOG_02701	-0.51507	0.000156157
CAOG_04900	-0.514089	9.42841e-06
CAOG_04513	-0.513853	0.00215326
CAOG_02512	-0.510014	1.33749e-05
CAOG_03658	-0.509744	0.00110871
CAOG_07708	-0.508042	0.00012946
CAOG_02408	-0.507415	0.000165598
CAOG_06917	-0.506113	0.0237403
CAOG_00164	-0.505606	3.82761e-05
CAOG_05158	-0.50498	0.019456
CAOG_08220	-0.503649	0.000326466
CAOG_00093	-0.503361	0.0017947
CAOG_00911	-0.502873	7.50899e-05
CAOG_07030	-0.501145	6.02545e-05
CAOG_09002	-0.500247	0.000279639
CAOG_03609	-0.500104	0.00121912
