# Supplementary material for: Genome editing in the unicellular holozoan Capsaspora owczarzaki suggests a premetazoan role for the Hippo pathway in multicellular morphogenesis
Source: eLife. 2022 Jun 6;11:e77598. doi: 10.7554/eLife.77598 (PMC9170242; doi:10.7554/eLife.77598)
Supplement: Supplementary file 2. [file elife-77598-supp2.xlsx]

## Sheet: Sheet1
GENE_NAME	WT-VS-yki-/-.logFC	WT-VS-yki-/-.FDR
CAOG_06062	0.500806	2.34313e-05
CAOG_05990	0.500807	1.99823e-05
CAOG_04051	0.50101	0.000376562
CAOG_06024	0.501071	0.00178277
CAOG_05744	0.503248	0.000329952
CAOG_05917	0.504324	0.000234197
CAOG_04291	0.504695	8.24471e-06
CAOG_08709	0.504958	0.000377572
CAOG_05898	0.505392	0.0161385
CAOG_01773	0.50642	0.0419099
CAOG_04058	0.507149	0.000117308
CAOG_04225	0.50739	0.00191204
CAOG_04476	0.507719	0.000306715
CAOG_06204	0.507955	0.000689149
CAOG_08209	0.50831	0.00224923
CAOG_05881	0.509306	3.00293e-05
CAOG_02833	0.509357	0.0084309
CAOG_04234	0.511016	0.00352343
CAOG_08173	0.511089	0.00322703
CAOG_05804	0.511308	9.29533e-05
CAOG_06310	0.511509	0.027763
CAOG_05365	0.511616	0.0442281
CAOG_08084	0.512035	0.000327266
CAOG_08094	0.513505	7.24701e-07
CAOG_06832	0.513758	0.000212947
CAOG_06191	0.513842	8.33328e-05
CAOG_05783	0.51438	0.0183853
CAOG_04484	0.515087	9.25509e-07
CAOG_05769	0.515546	0.000979992
CAOG_05738	0.516205	2.3655e-05
CAOG_04046	0.516537	2.11808e-05
CAOG_04314	0.5171	3.78859e-05
CAOG_05985	0.517799	0.000416739
CAOG_04105	0.517857	0.00616694
CAOG_06185	0.517906	3.42958e-05
CAOG_04009	0.517921	0.0108874
CAOG_05697	0.518056	0.000306715
CAOG_05763	0.519169	0.000137568
CAOG_04081	0.519374	8.03542e-05
CAOG_01108	0.520782	0.000415572
CAOG_05770	0.52084	4.42001e-05
CAOG_08941	0.521336	2.05362e-06
CAOG_06027	0.52163	0.000282036
CAOG_05893	0.522218	2.4609e-06
CAOG_04455	0.52227	2.33704e-05
CAOG_05946	0.522319	4.71712e-06
CAOG_06028	0.522824	1.05955e-05
CAOG_05728	0.523639	0.0420088
CAOG_06075	0.523798	0.000617144
CAOG_08559	0.523907	0.00354683
CAOG_04397	0.524496	2.48723e-05
CAOG_08816	0.524614	1.1547e-05
CAOG_08037	0.525272	0.00697998
CAOG_05764	0.526482	0.000239201
CAOG_08079	0.526704	0.0340902
CAOG_04033	0.526958	4.79369e-05
CAOG_08933	0.527949	1.78041e-05
CAOG_08915	0.5282	0.00819708
CAOG_04462	0.528608	0.00548305
CAOG_07991	0.529219	0.000186672
CAOG_06090	0.529378	0.000717196
CAOG_05931	0.529453	0.00110062
CAOG_05812	0.529469	2.2285e-05
CAOG_09149	0.529639	2.19865e-06
CAOG_07280	0.530849	0.000897374
CAOG_02778	0.53093	0.00209169
CAOG_04763	0.532078	0.0240226
CAOG_04030	0.533062	5.08328e-07
CAOG_05685	0.533108	0.000335927
CAOG_06031	0.533703	0.000148035
CAOG_06000	0.534064	0.000510942
CAOG_05784	0.534155	0.0101891
CAOG_04448	0.534638	0.00503888
CAOG_06056	0.534731	3.11578e-06
CAOG_07201	0.535157	0.000841471
CAOG_06168	0.53517	0.00588905
CAOG_08151	0.535215	0.0013295
CAOG_08773	0.535289	0.000148045
CAOG_04132	0.535923	2.5859e-05
CAOG_06403	0.536027	1.84577e-05
CAOG_05333	0.536173	0.0187554
CAOG_06167	0.536745	0.00299235
CAOG_05772	0.537289	2.76561e-05
CAOG_08944	0.537424	0.000391361
CAOG_07947	0.538759	0.0223694
CAOG_04233	0.539245	0.00317336
CAOG_04303	0.539262	0.000974144
CAOG_05942	0.539284	3.76906e-05
CAOG_04473	0.539314	0.000134039
CAOG_05972	0.539723	0.000307128
CAOG_04486	0.539855	5.46833e-05
CAOG_06606	0.540055	0.0230434
CAOG_07981	0.54006	0.01035
CAOG_00729	0.540844	0.000415497
CAOG_08148	0.540964	0.000171603
CAOG_05933	0.541111	0.000106952
CAOG_03448	0.541289	0.000882829
CAOG_06047	0.541542	1.19857e-06
CAOG_01163	0.541966	5.9731e-05
CAOG_04271	0.542373	4.16108e-05
CAOG_04095	0.542732	1.27916e-05
CAOG_06106	0.543068	2.55113e-06
CAOG_05892	0.544	1.94492e-05
CAOG_06869	0.54418	0.000101051
CAOG_06142	0.544828	6.48714e-06
CAOG_05890	0.544859	0.000134689
CAOG_01006	0.545259	0.0337039
CAOG_05882	0.545392	0.000131327
CAOG_06176	0.545623	5.84845e-05
CAOG_04479	0.545762	3.77434e-05
CAOG_04003	0.545877	0.0326731
CAOG_06040	0.546206	3.14087e-07
CAOG_06734	0.546627	0.017172
CAOG_07939	0.547162	0.000726219
CAOG_05987	0.548388	4.92986e-06
CAOG_04161	0.54868	5.0975e-05
CAOG_04020	0.548687	2.18543e-05
CAOG_08614	0.549179	0.000160122
CAOG_06139	0.550797	1.21783e-05
CAOG_03993	0.551497	0.00113527
CAOG_04211	0.551814	2.1952e-05
CAOG_07143	0.551919	9.2812e-07
CAOG_07229	0.552196	0.000270411
CAOG_03178	0.552423	0.00069971
CAOG_07934	0.552591	9.38192e-06
hypothetical	0.554037	6.98845e-05
CAOG_04390	0.55448	4.33577e-05
CAOG_06009	0.554786	6.02155e-06
CAOG_04121	0.555458	3.55763e-05
CAOG_03983	0.555987	2.04967e-05
CAOG_07452	0.556656	0.00136315
CAOG_08916	0.557651	0.00939332
CAOG_00594	0.558011	0.000678204
CAOG_08057	0.558711	2.45057e-06
CAOG_04075	0.55912	8.42498e-06
CAOG_05850	0.560153	1.08421e-06
CAOG_04169	0.56058	0.000614955
CAOG_08182	0.56102	0.000373734
CAOG_00037	0.561281	0.000166714
CAOG_05814	0.561959	2.92942e-06
CAOG_04202	0.5625	6.1045e-05
CAOG_04415	0.562575	0.000175206
CAOG_08493	0.563661	1.01156e-05
CAOG_01284	0.563722	0.00506252
CAOG_07674	0.564355	0.00167007
CAOG_09172	0.564638	0.00840328
CAOG_08103	0.564996	0.000321577
CAOG_05765	0.564999	1.29252e-07
CAOG_06354	0.565841	0.00518593
CAOG_08784	0.566027	0.0015652
CAOG_08943	0.566256	0.000166714
CAOG_04275	0.567952	4.19119e-07
CAOG_06161	0.5683	1.39673e-06
CAOG_04454	0.568562	5.20987e-05
CAOG_07648	0.570471	0.000963973
CAOG_06066	0.570474	2.61346e-07
CAOG_04282	0.571029	9.87289e-06
CAOG_06891	0.571305	2.92406e-05
CAOG_02564	0.571397	0.00143396
CAOG_04145	0.571511	2.79158e-05
CAOG_02795	0.571545	0.011314
CAOG_08407	0.572662	0.0037753
CAOG_04260	0.572993	4.09497e-08
CAOG_04104	0.573094	4.90901e-05
CAOG_00531	0.573802	5.52755e-05
CAOG_04247	0.57469	5.56196e-06
CAOG_04099	0.574691	1.63417e-06
CAOG_09170	0.574884	0.0162857
CAOG_04004	0.575003	9.01797e-05
CAOG_05930	0.575027	2.38399e-07
CAOG_00130	0.575127	0.000493048
CAOG_04620	0.575204	0.0175161
CAOG_05082	0.575369	0.000590783
CAOG_06030	0.576696	0.00588608
CAOG_09199	0.576859	0.00256323
CAOG_06041	0.578531	8.69048e-05
CAOG_00282	0.58022	0.0379148
CAOG_02436	0.580511	0.0389961
CAOG_06876	0.580545	0.0350429
CAOG_02952	0.580753	0.000915802
CAOG_05329	0.581345	0.0215418
CAOG_08093	0.581719	1.83732e-07
CAOG_04306	0.582135	2.83183e-06
CAOG_05948	0.582161	1.12892e-07
CAOG_09178	0.582857	0.0188749
CAOG_04355	0.582942	0.000548998
CAOG_08019	0.583066	0.00318754
CAOG_04148	0.583144	1.51251e-05
CAOG_05869	0.583827	1.87045e-08
CAOG_08168	0.584009	5.50753e-05
CAOG_05918	0.58444	0.000497558
CAOG_00869	0.585467	4.57694e-05
CAOG_00458	0.586006	2.7573e-06
CAOG_03967	0.58655	0.00477042
CAOG_05557	0.587168	5.05049e-06
CAOG_05960	0.587369	0.00180053
CAOG_04143	0.5887	1.2358e-05
CAOG_06053	0.589067	4.05238e-06
CAOG_05824	0.589326	1.33941e-05
CAOG_06068	0.590035	2.09478e-07
CAOG_08022	0.590234	4.11233e-08
CAOG_05757	0.590268	1.80028e-07
CAOG_08099	0.590356	3.72314e-05
CAOG_07515	0.591008	0.0476935
CAOG_06173	0.591307	2.38399e-07
CAOG_06107	0.592661	0.000261704
CAOG_05955	0.593528	0.00489975
CAOG_04220	0.594398	6.9095e-07
CAOG_04427	0.594595	3.48047e-05
CAOG_06153	0.594707	6.91742e-06
CAOG_06194	0.594903	3.4909e-06
CAOG_06043	0.594943	3.63948e-07
CAOG_05781	0.595213	3.5901e-07
CAOG_06145	0.595556	1.79664e-06
CAOG_08195	0.596628	2.33519e-07
CAOG_05727	0.597314	7.84064e-08
CAOG_04962	0.598418	0.000757493
CAOG_05889	0.598902	3.62049e-07
CAOG_04209	0.601088	7.4029e-06
CAOG_08772	0.601132	4.90901e-05
CAOG_04096	0.601656	5.5206e-09
CAOG_05794	0.602353	4.56699e-05
CAOG_08122	0.602931	3.50206e-05
CAOG_03988	0.603445	5.59516e-07
CAOG_06012	0.603795	5.69281e-06
CAOG_04350	0.604017	2.0065e-06
CAOG_02694	0.605189	5.46833e-05
CAOG_08955	0.607019	6.08364e-07
CAOG_01411	0.607133	0.00908
CAOG_08062	0.607671	8.36975e-05
CAOG_05885	0.60821	1.70765e-06
CAOG_05911	0.6084	5.86732e-06
CAOG_04499	0.609106	4.28741e-07
CAOG_04329	0.609185	0.00277472
CAOG_06071	0.609826	5.5863e-06
CAOG_08946	0.610185	0.000377802
CAOG_04465	0.613442	4.25928e-07
CAOG_08268	0.613634	9.09449e-07
CAOG_08115	0.61364	3.77121e-07
CAOG_09143	0.613686	6.48714e-06
CAOG_03998	0.615238	2.19839e-07
CAOG_04273	0.615512	3.52723e-08
CAOG_09131	0.615734	0.000176804
CAOG_05951	0.615808	4.83671e-05
CAOG_05819	0.615986	1.77668e-05
CAOG_03997	0.616034	6.0572e-06
CAOG_03975	0.616091	6.81215e-06
CAOG_04571	0.61621	0.0012573
CAOG_05944	0.616901	4.8346e-05
CAOG_04411	0.617672	0.000412025
CAOG_01018	0.618029	0.0012573
CAOG_05910	0.618507	0.00949008
CAOG_05549	0.619431	0.0191616
CAOG_05996	0.620513	1.69094e-05
CAOG_06668	0.620726	0.0357163
CAOG_04346	0.620911	0.000215213
CAOG_04321	0.621947	0.00110034
CAOG_05806	0.622212	2.4609e-06
CAOG_08009	0.622357	0.00489745
CAOG_03980	0.622479	3.05428e-08
CAOG_06175	0.624618	1.52774e-06
CAOG_02532	0.624666	0.00658779
CAOG_08275	0.62488	1.68878e-07
CAOG_08920	0.625113	0.000241783
CAOG_04259	0.625552	5.8592e-07
CAOG_01283	0.626214	0.033563
CAOG_08265	0.626645	0.00450145
CAOG_05720	0.626715	3.36007e-07
CAOG_04239	0.627193	1.99684e-05
CAOG_02875	0.627204	0.000380339
CAOG_08932	0.627359	1.0703e-09
CAOG_08072	0.627692	5.16343e-06
CAOG_09144	0.627963	0.00222049
CAOG_00084	0.628453	0.0307056
CAOG_08766	0.629151	0.000167888
CAOG_02771	0.629606	5.22444e-05
CAOG_09101	0.629781	3.82675e-05
CAOG_08748	0.630649	5.02868e-05
CAOG_05072	0.63158	5.4683e-06
CAOG_09174	0.632032	0.0034246
CAOG_06110	0.632297	6.02271e-06
CAOG_05774	0.63278	5.67835e-07
CAOG_08171	0.633503	0.000287327
CAOG_04295	0.634422	3.22012e-05
CAOG_08771	0.636159	6.15435e-05
CAOG_05787	0.636559	1.88928e-06
CAOG_08378	0.637627	0.00491386
CAOG_06120	0.638235	0.00118613
CAOG_07100	0.639405	0.00429351
CAOG_02902	0.63954	0.000916024
CAOG_04010	0.639611	0.000693553
CAOG_08077	0.639917	4.22812e-06
CAOG_06150	0.639921	5.33513e-06
CAOG_02292	0.640703	0.0132529
CAOG_01293	0.641041	4.8346e-05
CAOG_04290	0.64167	5.77734e-09
CAOG_03352	0.642467	0.00359002
CAOG_04142	0.642627	0.000135966
CAOG_06136	0.643202	5.04899e-08
CAOG_04226	0.643421	3.37449e-05
CAOG_00897	0.6435	0.00222049
CAOG_02782	0.644734	0.0357939
CAOG_04669	0.645109	1.98991e-05
CAOG_02769	0.645295	1.4507e-05
CAOG_05846	0.645362	1.92863e-05
CAOG_07217	0.645925	0.00150131
CAOG_05962	0.646326	5.5863e-06
CAOG_03970	0.647455	9.25509e-07
CAOG_05809	0.647695	0.000276083
CAOG_00821	0.64815	2.705e-05
CAOG_05760	0.648306	2.61346e-07
CAOG_08011	0.650322	0.00164564
CAOG_02649	0.651055	1.14624e-05
CAOG_04268	0.651971	2.63712e-06
CAOG_04103	0.652466	2.83113e-05
CAOG_06035	0.652834	0.000102953
CAOG_08041	0.653314	7.57794e-07
CAOG_04120	0.653451	9.15721e-07
CAOG_05103	0.654235	0.0299094
CAOG_04084	0.654274	2.81854e-07
CAOG_05952	0.655282	1.02363e-06
CAOG_03338	0.655962	2.11808e-05
CAOG_01028	0.656156	4.94744e-06
CAOG_06328	0.658062	1.71584e-05
CAOG_04109	0.659041	1.29252e-07
CAOG_02061	0.659158	9.64913e-05
CAOG_01122	0.659358	1.25464e-05
CAOG_03283	0.659744	0.00214076
CAOG_06968	0.660497	4.00894e-05
CAOG_00077	0.661051	0.0367615
CAOG_06197	0.661971	3.01951e-06
CAOG_04122	0.662318	1.58561e-07
CAOG_05755	0.66261	2.99854e-06
CAOG_04277	0.663066	2.36793e-09
CAOG_08922	0.663226	4.17425e-06
CAOG_04007	0.665495	2.81734e-08
CAOG_06169	0.665547	1.69783e-09
CAOG_04477	0.6659	3.55578e-07
CAOG_06113	0.667804	0.000754676
CAOG_06021	0.669579	1.16838e-06
CAOG_04435	0.669895	1.19396e-07
CAOG_02605	0.670705	4.67437e-06
CAOG_02146	0.671283	0.00711815
CAOG_06134	0.672007	2.83752e-07
CAOG_08007	0.673159	2.78892e-09
CAOG_04469	0.673423	1.38503e-05
CAOG_08396	0.673575	0.00190546
CAOG_03978	0.675648	0.00795794
CAOG_03584	0.675812	7.60274e-10
CAOG_05790	0.678048	8.83119e-08
CAOG_04015	0.67901	1.18e-08
CAOG_06088	0.679901	3.86961e-07
CAOG_06063	0.680048	1.11117e-06
CAOG_05977	0.681293	3.7442e-08
CAOG_07091	0.681852	0.0214479
CAOG_04251	0.68306	2.20105e-08
CAOG_05936	0.683252	7.32563e-05
CAOG_01877	0.683318	0.0392986
CAOG_06143	0.686519	5.36057e-09
CAOG_00884	0.68676	0.028302
CAOG_08133	0.687497	1.30043e-10
CAOG_05927	0.687838	2.74852e-08
CAOG_02676	0.687868	0.00660184
CAOG_01863	0.688105	0.000511679
CAOG_05973	0.688454	2.79137e-10
CAOG_08025	0.689805	5.11682e-09
CAOG_08291	0.690237	0.0021916
CAOG_04068	0.690886	3.83755e-08
CAOG_06070	0.691328	2.12367e-08
CAOG_04149	0.692389	1.91889e-07
CAOG_06111	0.694353	7.40776e-06
CAOG_04118	0.695113	4.44067e-07
CAOG_00802	0.695598	0.00880686
CAOG_00154	0.695978	9.51822e-05
CAOG_08855	0.696591	3.22012e-05
CAOG_07718	0.696868	6.81215e-06
CAOG_06211	0.697158	0.000221465
CAOG_06060	0.69737	2.22775e-08
CAOG_04641	0.697511	0.00189538
CAOG_04052	0.698453	2.33519e-07
CAOG_02232	0.69921	0.00947101
CAOG_05968	0.702628	0.00150571
CAOG_06065	0.702778	5.74654e-08
CAOG_06607	0.702936	0.00180082
CAOG_05932	0.703042	1.38503e-05
CAOG_06050	0.704023	3.97898e-06
CAOG_05989	0.704502	9.09449e-07
CAOG_05734	0.705378	6.24556e-06
CAOG_08157	0.706237	6.04702e-09
CAOG_08052	0.707168	1.1139e-05
CAOG_08950	0.708309	0.00179204
CAOG_00615	0.708803	0.011817
CAOG_04417	0.709005	0.0498076
CAOG_04192	0.709299	0.00073724
CAOG_06081	0.7108	1.48268e-07
CAOG_02609	0.711328	3.14087e-07
CAOG_00873	0.711373	2.02815e-05
CAOG_08034	0.711784	5.84767e-07
CAOG_04215	0.711949	1.04509e-09
CAOG_08931	0.713549	7.45393e-08
CAOG_00231	0.715524	5.79649e-05
CAOG_05971	0.716532	6.67977e-08
CAOG_06195	0.717237	1.07657e-05
CAOG_06141	0.718512	2.59124e-09
CAOG_05914	0.719489	5.37556e-09
CAOG_04509	0.719766	0.000134689
CAOG_01310	0.721717	0.0231712
CAOG_05895	0.721924	7.34945e-11
CAOG_04443	0.724428	3.81188e-10
CAOG_08008	0.724708	4.96896e-08
CAOG_08273	0.724822	7.72368e-12
CAOG_04083	0.725251	1.56037e-09
CAOG_04154	0.726807	1.10608e-09
CAOG_04460	0.727848	0.000171603
CAOG_01703	0.728817	0.000567632
CAOG_00422	0.729754	0.0142154
CAOG_08158	0.732217	3.12557e-08
CAOG_05836	0.732557	1.37076e-11
CAOG_04071	0.732952	2.22775e-08
CAOG_03408	0.734265	0.000299741
CAOG_02366	0.735064	2.38399e-07
CAOG_05907	0.737948	2.20105e-08
CAOG_05888	0.738984	0.00128188
CAOG_00771	0.740024	0.0132832
CAOG_05886	0.741303	2.94962e-10
CAOG_04288	0.742791	6.15435e-05
CAOG_05899	0.743567	2.81822e-10
CAOG_05969	0.744178	1.03666e-11
CAOG_08939	0.744474	4.22031e-09
CAOG_06011	0.745011	9.08331e-10
CAOG_07384	0.745778	0.00159375
CAOG_04478	0.746342	1.26015e-05
CAOG_04682	0.746563	0.000733171
CAOG_05641	0.74913	0.000222603
CAOG_06751	0.750549	0.00300367
CAOG_04445	0.752635	7.15367e-08
CAOG_03451	0.752919	0.00195686
CAOG_04976	0.755211	0.0348778
CAOG_08047	0.755255	1.90051e-08
CAOG_03414	0.755822	9.90193e-08
CAOG_05751	0.757839	7.12613e-06
CAOG_07018	0.76245	2.55363e-07
CAOG_07467	0.763366	6.2085e-09
CAOG_06159	0.763756	7.71747e-06
CAOG_05957	0.764437	3.07871e-05
CAOG_09192	0.768221	4.5736e-10
CAOG_02551	0.768266	4.90901e-05
CAOG_06059	0.76887	1.22933e-11
CAOG_04430	0.772319	2.15256e-11
CAOG_06019	0.77383	7.45114e-08
CAOG_05560	0.773891	5.98114e-06
CAOG_06586	0.777169	4.87573e-05
CAOG_08029	0.777672	4.01919e-10
CAOG_08959	0.778194	0.00017136
CAOG_05906	0.779791	1.05809e-08
CAOG_07199	0.780669	3.69381e-09
CAOG_00207	0.781669	1.00863e-07
CAOG_00290	0.781718	2.37222e-07
CAOG_06026	0.781874	4.31413e-12
CAOG_05752	0.783036	6.27436e-08
CAOG_00723	0.784065	0.0317245
CAOG_05127	0.785326	4.91936e-08
CAOG_08256	0.78602	2.36004e-11
CAOG_01348	0.787243	0.00299175
CAOG_08114	0.787785	2.7573e-06
CAOG_04101	0.791292	1.00742e-05
CAOG_08139	0.795201	7.82073e-10
CAOG_06117	0.796664	1.63754e-10
CAOG_05986	0.797446	0.000996285
CAOG_04497	0.797604	0.00347745
CAOG_08263	0.799773	2.15001e-06
CAOG_08250	0.800345	8.96498e-08
CAOG_03939	0.801628	1.56447e-05
CAOG_05844	0.802685	4.70704e-06
CAOG_04557	0.803289	0.00801096
CAOG_00565	0.803669	0.00113652
CAOG_05828	0.804384	1.65898e-09
CAOG_05561	0.807694	0.000325413
CAOG_05919	0.808106	2.2613e-11
CAOG_04463	0.80824	0.00029213
CAOG_09173	0.808253	2.19185e-14
CAOG_05747	0.809414	3.48757e-10
CAOG_05705	0.810266	0.0290053
CAOG_08257	0.810877	2.40933e-12
CAOG_04254	0.811316	1.17759e-08
CAOG_05761	0.811837	2.90938e-08
CAOG_05447	0.814833	8.84087e-09
CAOG_06119	0.816067	1.75873e-07
CAOG_04318	0.81704	1.1201e-05
CAOG_08067	0.818825	4.86382e-14
CAOG_01668	0.824264	0.000252673
CAOG_07458	0.827018	0.00539336
CAOG_08254	0.827066	1.69929e-06
CAOG_04021	0.827462	5.79649e-05
CAOG_05950	0.827865	2.31391e-10
CAOG_08562	0.831075	1.15119e-05
CAOG_08150	0.831175	8.43361e-12
CAOG_06100	0.833027	3.32195e-08
CAOG_06198	0.833841	0.000195618
CAOG_09193	0.83612	0.000160122
CAOG_05887	0.836475	3.09277e-12
CAOG_04376	0.837425	2.10985e-11
CAOG_07553	0.841186	0.00893723
CAOG_03852	0.843418	0.000252531
CAOG_04447	0.844535	3.71648e-09
CAOG_06905	0.844564	2.87101e-07
CAOG_04153	0.852129	1.18253e-16
CAOG_02752	0.855769	8.71581e-06
CAOG_08272	0.856614	3.61957e-07
CAOG_08345	0.856845	0.00211454
CAOG_07071	0.860906	6.33861e-05
CAOG_02517	0.861211	4.84962e-05
CAOG_00167	0.861521	0.000114777
CAOG_06688	0.861955	0.0094733
CAOG_00377	0.866532	0.00286697
CAOG_06171	0.867086	0.000135089
CAOG_06061	0.8671	2.09807e-15
CAOG_04008	0.867979	4.17169e-06
CAOG_05820	0.868564	4.96508e-12
CAOG_05058	0.868688	1.03824e-08
CAOG_07463	0.870212	1.07082e-06
CAOG_08691	0.870536	2.07062e-08
CAOG_00058	0.873165	2.14093e-07
CAOG_08160	0.874441	4.84999e-08
CAOG_02898	0.875201	2.99243e-10
CAOG_08930	0.876109	0.00913816
CAOG_06626	0.876554	2.69987e-10
CAOG_02719	0.881619	4.40239e-06
CAOG_05900	0.884846	2.07177e-13
CAOG_04257	0.885064	0.0110401
CAOG_02812	0.890925	2.13512e-06
CAOG_06158	0.892069	2.23778e-09
CAOG_08132	0.895094	0.00017136
CAOG_04429	0.895404	0.000139499
CAOG_06018	0.896746	3.83755e-08
CAOG_05739	0.899727	4.32408e-10
CAOG_00813	0.900504	5.06776e-06
CAOG_07723	0.904566	4.60374e-05
CAOG_05059	0.907979	6.40371e-09
CAOG_00194	0.909884	1.02124e-06
CAOG_04358	0.911825	9.43177e-14
CAOG_04155	0.915382	7.87483e-16
CAOG_06864	0.915635	7.59839e-12
CAOG_05943	0.91579	1.96915e-08
CAOG_08245	0.916295	9.25509e-07
CAOG_04238	0.916605	6.06611e-05
CAOG_04252	0.917618	3.5058e-15
CAOG_08253	0.918702	2.16536e-13
CAOG_05964	0.919724	7.55835e-16
CAOG_08073	0.920268	0.00786498
CAOG_06187	0.922429	4.40932e-12
CAOG_05821	0.925926	9.33597e-12
CAOG_02147	0.92891	0.00283568
CAOG_04232	0.933036	0.00153046
CAOG_05756	0.936422	3.20596e-18
CAOG_02650	0.942056	0.00331912
CAOG_08746	0.942326	1.46047e-15
CAOG_05223	0.947629	0.000152869
CAOG_08782	0.956008	0.00457928
CAOG_04237	0.957846	3.37449e-05
CAOG_07525	0.961189	0.00114845
CAOG_04546	0.965531	2.63318e-19
CAOG_08264	0.966508	2.35325e-08
CAOG_04069	0.96751	8.40164e-09
CAOG_08255	0.96803	0.0103479
CAOG_01008	0.974054	0.00357333
CAOG_04041	0.977179	7.04073e-08
CAOG_01021	0.978257	2.46237e-07
CAOG_08082	0.985863	2.2584e-08
CAOG_04456	0.997131	8.10806e-12
CAOG_06552	1.00105	0.0253918
CAOG_04327	1.00111	1.74276e-16
CAOG_05435	1.00212	8.89798e-05
CAOG_08246	1.0024	2.71912e-18
CAOG_01962	1.00297	0.000650328
CAOG_07779	1.00574	0.00462192
CAOG_07922	1.00586	1.41429e-09
CAOG_07192	1.00893	0.0178021
CAOG_08774	1.01125	0.000855037
CAOG_07627	1.01364	0.00347745
CAOG_08211	1.01388	8.37312e-07
CAOG_09003	1.01571	0.017172
CAOG_06348	1.01821	0.0254209
CAOG_04451	1.01986	1.15827e-09
CAOG_03230	1.02002	4.13927e-06
CAOG_03674	1.02083	3.56405e-09
CAOG_08836	1.02169	2.09478e-07
CAOG_03934	1.0227	2.3655e-05
CAOG_08006	1.02652	0.0131877
CAOG_08271	1.02934	2.83288e-15
CAOG_04501	1.03281	1.58656e-12
CAOG_07518	1.04179	2.36116e-16
CAOG_07542	1.04241	0.000531936
CAOG_08577	1.04516	0.00899417
CAOG_05708	1.0476	9.88808e-11
CAOG_08386	1.0487	3.59376e-05
CAOG_07102	1.05039	0.0263967
CAOG_02580	1.05269	0.00115287
CAOG_05612	1.05936	5.54974e-07
CAOG_06102	1.06423	3.40872e-07
CAOG_04330	1.06679	3.60496e-05
CAOG_05262	1.06875	3.06372e-06
CAOG_05916	1.07042	3.94494e-06
CAOG_08872	1.07186	3.34955e-11
CAOG_05958	1.09124	3.71488e-08
CAOG_05778	1.09718	1.28673e-09
CAOG_00933	1.09785	4.56176e-06
CAOG_04632	1.10044	1.5856e-08
CAOG_05813	1.10272	4.59889e-15
CAOG_08241	1.1073	2.84e-15
CAOG_08075	1.11105	3.94438e-12
CAOG_06822	1.11151	0.00019214
CAOG_04124	1.11911	7.26073e-05
CAOG_08076	1.12634	3.14087e-07
CAOG_08839	1.12675	7.7582e-07
CAOG_06991	1.13057	3.73132e-06
CAOG_00403	1.13174	0.000997906
CAOG_03879	1.13214	3.05843e-09
CAOG_09191	1.13769	3.69381e-09
CAOG_03355	1.13866	2.62848e-08
CAOG_08083	1.14066	2.13172e-20
CAOG_02438	1.14716	1.91829e-05
CAOG_07459	1.15028	6.8465e-07
CAOG_08380	1.15496	0.0011251
CAOG_08436	1.15581	0.000220484
CAOG_06034	1.16634	0.00238668
CAOG_04436	1.16965	6.67544e-06
CAOG_05626	1.17384	8.10045e-08
CAOG_04851	1.17969	3.75995e-07
CAOG_08070	1.18555	0.00152926
CAOG_05956	1.18857	1.79998e-18
CAOG_00786	1.19086	8.10672e-14
CAOG_00001	1.20158	9.97403e-14
CAOG_05514	1.20332	0.00167551
CAOG_08244	1.20356	0.000290814
CAOG_06049	1.21337	1.23365e-17
CAOG_05229	1.21456	9.83107e-15
CAOG_08367	1.22554	2.27559e-13
CAOG_08035	1.22971	6.82286e-14
CAOG_08259	1.23827	2.53555e-16
CAOG_05334	1.25627	1.09994e-19
CAOG_08185	1.26656	1.39673e-06
CAOG_05796	1.27197	4.88521e-18
CAOG_02897	1.28545	2.65392e-19
CAOG_03570	1.29972	4.69291e-07
cell	1.30806	5.82665e-14
CAOG_03090	1.32432	9.78776e-06
CAOG_01607	1.3263	7.17367e-06
CAOG_08454	1.32801	2.76561e-05
CAOG_05874	1.3281	2.16435e-06
CAOG_01718	1.34201	2.54115e-07
CAOG_04296	1.34524	1.48083e-11
CAOG_08206	1.34613	3.472e-15
CAOG_05515	1.34894	0.000199767
CAOG_06667	1.3548	1.75106e-05
CAOG_05523	1.35532	4.27707e-29
CAOG_05862	1.38455	1.79998e-18
CAOG_05647	1.39342	1.08051e-05
CAOG_07398	1.39451	4.7433e-10
CAOG_05843	1.39865	1.26902e-06
CAOG_01829	1.40233	9.19937e-07
CAOG_02054	1.40257	5.46269e-07
CAOG_07732	1.40331	0.00774401
CAOG_08752	1.40904	6.77697e-12
CAOG_00114	1.42677	9.10347e-10
CAOG_05434	1.42739	1.5337e-05
CAOG_03524	1.43234	0.000445663
CAOG_03628	1.43804	2.78678e-11
CAOG_04404	1.45256	2.1722e-05
CAOG_02800	1.45829	8.90912e-05
CAOG_06243	1.45927	4.20663e-07
CAOG_01835	1.46196	2.62073e-23
CAOG_06147	1.46279	1.79929e-22
CAOG_05855	1.4671	4.61797e-19
CAOG_08249	1.47207	2.4243e-28
CAOG_07284	1.47224	0.0105327
CAOG_07823	1.47375	2.68814e-05
CAOG_05854	1.47682	8.99143e-15
CAOG_01410	1.48648	0.00252205
CAOG_04135	1.48778	3.23004e-07
CAOG_04648	1.52793	4.73742e-12
CAOG_02154	1.53189	1.84405e-07
CAOG_05031	1.53966	4.34247e-21
CAOG_09138	1.5456	7.78114e-17
CAOG_05691	1.55016	6.19394e-17
CAOG_05312	1.55122	5.89394e-09
CAOG_08604	1.55588	2.72558e-07
CAOG_08458	1.566	0.0011736
CAOG_06523	1.56958	0.00233194
CAOG_03409	1.57477	3.6614e-06
CAOG_09013	1.5874	1.08659e-10
CAOG_06156	1.5908	2.06053e-19
CAOG_03760	1.6123	0.00281976
CAOG_08531	1.61532	1.26829e-19
CAOG_02682	1.61668	8.14591e-14
CAOG_05902	1.61765	1.09281e-07
CAOG_08873	1.62209	2.4609e-06
CAOG_06172	1.62652	3.23166e-05
CAOG_03873	1.63558	4.54267e-06
CAOG_01972	1.6404	0.00110062
CAOG_07063	1.6407	4.61367e-05
CAOG_02742	1.64824	4.51676e-13
CAOG_04227	1.64826	1.06798e-06
CAOG_03996	1.64991	1.07061e-05
CAOG_03680	1.65515	1.21183e-09
CAOG_03457	1.66923	2.44002e-06
CAOG_08172	1.67475	4.77213e-25
CAOG_08459	1.67824	0.000793044
CAOG_00166	1.69047	6.38851e-13
CAOG_07932	1.7075	1.13391e-17
CAOG_02681	1.7216	2.59415e-14
CAOG_05915	1.73101	7.24973e-10
CAOG_05418	1.73589	0.00731245
CAOG_07136	1.73667	4.44373e-07
CAOG_02439	1.74364	1.23343e-35
CAOG_07810	1.75448	1.03011e-12
CAOG_00439	1.77939	1.10297e-06
CAOG_08344	1.79932	4.57845e-09
CAOG_06275	1.80353	1.63406e-05
CAOG_01409	1.8042	1.72876e-37
CAOG_04102	1.81424	6.42255e-08
CAOG_05912	1.82096	5.3734e-09
CAOG_07578	1.8225	5.97416e-06
CAOG_07618	1.82365	1.80028e-07
CAOG_02108	1.85807	7.44543e-07
CAOG_04804	1.85933	3.02426e-20
CAOG_03985	1.86251	2.34775e-05
CAOG_01737	1.88078	9.55743e-14
CAOG_06990	1.88956	6.49686e-09
CAOG_06383	1.8959	2.3261e-07
CAOG_01470	1.92781	1.1967e-20
CAOG_03050	1.92954	0.00179204
CAOG_06022	1.93286	5.56259e-21
CAOG_04627	1.94391	5.14434e-11
CAOG_08243	1.94454	3.32826e-07
CAOG_04470	1.94732	0.000117308
CAOG_05453	1.94903	7.24701e-07
CAOG_08089	1.94987	0.000631186
CAOG_06931	1.95164	3.95567e-27
CAOG_06203	1.97289	3.83288e-18
CAOG_06157	1.97764	5.75502e-21
CAOG_08074	1.9991	8.29567e-16
CAOG_06135	2.03163	4.19879e-17
CAOG_08113	2.03542	1.96277e-15
CAOG_09080	2.05132	2.41457e-11
CAOG_09055	2.06072	6.91748e-12
CAOG_03987	2.06863	2.33477e-15
CAOG_02977	2.07135	6.2758e-12
CAOG_05754	2.07623	3.35954e-12
CAOG_02712	2.09772	1.1139e-05
CAOG_08270	2.10836	1.19456e-12
CAOG_08242	2.11755	2.19865e-06
CAOG_04171	2.13518	3.10823e-07
CAOG_08716	2.16766	7.25408e-27
CAOG_08457	2.20146	9.48478e-05
CAOG_06868	2.2765	7.06252e-34
CAOG_03777	2.27656	1.30068e-28
CAOG_01131	2.3219	4.9348e-15
CAOG_06105	2.33347	2.97211e-18
CAOG_01414	2.36737	5.82665e-14
CAOG_06956	2.40171	6.49686e-09
CAOG_04402	2.48749	7.99317e-18
CAOG_04412	2.50488	1.3588e-21
CAOG_04413	2.59663	1.14748e-10
CAOG_02790	2.63189	7.14023e-10
CAOG_06762	2.66003	1.18344e-15
CAOG_04403	2.69544	6.74722e-28
CAOG_08538	2.72648	3.06519e-20
CAOG_05949	2.7388	5.87182e-12
CAOG_06847	2.87576	1.32266e-28
CAOG_03729	2.91706	1.43138e-10
CAOG_08903	2.92101	4.4769e-22
CAOG_05741	2.92293	2.73659e-19
CAOG_09075	2.94461	1.17749e-17
CAOG_01970	2.94507	1.1384e-20
CAOG_08819	2.96048	1.05207e-21
CAOG_08912	2.96424	4.19503e-20
CAOG_09038	3.00151	7.96337e-23
CAOG_02494	3.01497	4.23468e-36
CAOG_09224	3.02517	9.35112e-24
CAOG_07833	3.02747	2.36995e-26
CAOG_09197	3.06868	1.36523e-22
CAOG_02031	3.16114	2.62222e-10
CAOG_02303	3.20527	2.43815e-66
CAOG_08247	3.20685	7.88122e-19
CAOG_09111	3.22518	5.82665e-14
CAOG_05603	3.3705	2.51283e-17
CAOG_07865	3.39525	5.47828e-21
CAOG_08788	3.48616	8.29567e-16
CAOG_02463	3.51833	8.89689e-20
CAOG_08154	3.55503	4.64274e-35
CAOG_03926	3.60127	0.00468363
CAOG_06180	3.60713	1.64349e-42
CAOG_01969	3.65912	3.13048e-37
CAOG_04246	3.74658	9.51337e-47
CAOG_08702	3.93705	1.26457e-19
CAOG_04917	4.10527	4.24611e-102
CAOG_08701	4.22437	4.13855e-49
CAOG_01518	4.25622	9.48824e-21
CAOG_03185	4.5253	2.42915e-81
CAOG_05204	4.55926	0.000774454
CAOG_02585	4.67499	2.17103e-28
CAOG_06828	4.86713	1.23515e-26
CAOG_06288	5.00649	4.241e-92
CAOG_08314	5.08884	3.49359e-30
CAOG_07988	5.23636	1.38838e-13
CAOG_03917	6.41646	2.00691e-68
CAOG_03916	7.32169	2.02512e-78
