# Supplementary material for: Genome editing in the unicellular holozoan Capsaspora owczarzaki suggests a premetazoan role for the Hippo pathway in multicellular morphogenesis
Source: eLife. 2022 Jun 6;11:e77598. doi: 10.7554/eLife.77598 (PMC9170242; doi:10.7554/eLife.77598)
Supplement: Supplementary file 3. [file elife-77598-supp3.xlsx]

## Sheet: Sheet1
Official Gene Symbol	Capsaspora Gene	WT-VS-yki-/-.logFC	Mammalian Ortholog Ensembl ID	name	description
CAOG_00422	Cdc42 GTPase-activating protein(CAOG_00422)	0.729754	ENSG00000134909	ARHGAP32	Rho GTPase activating protein 32 [Source:HGNC Symbol;Acc:HGNC:17399]
CAOG_04081	F-actin capping protein beta subunit(CAOG_04081)	0.519374	ENSG00000116489	CAPZA1	capping actin protein of muscle Z-line subunit alpha 1 [Source:HGNC Symbol;Acc:HGNC:1488]
CAOG_02719	amoeboid myosin I(CAOG_02719)	0.881619	ENSG00000157483	MYO1E	myosin IE [Source:HGNC Symbol;Acc:HGNC:7599]
CAOG_04454	arp2/3 complex 21 kDa subunit(CAOG_04454)	0.568562	ENSG00000111229	ARPC3	actin related protein 2/3 complex subunit 3 [Source:HGNC Symbol;Acc:HGNC:706]
CAOG_07648	brush border myosin I(CAOG_07648)	0.570471	ENSG00000176658	MYO1D	myosin ID [Source:HGNC Symbol;Acc:HGNC:7598]
CAOG_03729	hypothetical protein(CAOG_03729)	2.91706	ENSMUSG00000062929	CFL2	cofilin 2, muscle [Source:MGI Symbol;Acc:MGI:101763]
CAOG_04470	hypothetical protein(CAOG_04470)	1.94732	ENSG00000172757	CFL1	cofilin 1 [Source:HGNC Symbol;Acc:HGNC:1874]
CAOG_05820	hypothetical protein(CAOG_05820)	0.868564	ENSG00000084112	Ssh1
CAOG_05956	hypothetical protein(CAOG_05956)	1.18857	ENSG00000072110	ACTN1	actinin alpha 1 [Source:HGNC Symbol;Acc:HGNC:163]
CAOG_06891	hypothetical protein(CAOG_06891)	0.571305	ENSG00000197045	GMFB	glia maturation factor beta [Source:HGNC Symbol;Acc:HGNC:4373]
CAOG_06905	hypothetical protein(CAOG_06905)	0.844564	ENSG00000072110	ACTN1	actinin alpha 1 [Source:HGNC Symbol;Acc:HGNC:163]
CAOG_08154	hypothetical protein(CAOG_08154)	3.55503	ENSG00000097033	SH3GLB1	SH3 domain containing GRB2 like, endophilin B1 [Source:HGNC Symbol;Acc:HGNC:10833]
CAOG_08407	hypothetical protein(CAOG_08407)	0.572662	ENSG00000137877	SPTBN5	spectrin beta, non-erythrocytic 5 [Source:HGNC Symbol;Acc:HGNC:15680]
CAOG_04021	myosin-Ib(CAOG_04021)	0.827462	ENSG00000128641	MYO1B	myosin IB [Source:HGNC Symbol;Acc:HGNC:7596]
CAOG_04121	twinfilin-1(CAOG_04121)	0.555458	ENSG00000151239	TWF1	twinfilin actin binding protein 1 [Source:HGNC Symbol;Acc:HGNC:9620]
