# Supplementary material for: Genome editing in the unicellular holozoan Capsaspora owczarzaki suggests a premetazoan role for the Hippo pathway in multicellular morphogenesis
Source: eLife. 2022 Jun 6;11:e77598. doi: 10.7554/eLife.77598 (PMC9170242; doi:10.7554/eLife.77598)
Supplement: Supplementary file 4. [file elife-77598-supp4.xlsx]

## Sheet: Sheet1
GENE_NAME	Organism of protein orthologous to Capsaspora protein	Ortholog GeneID
CAOG_05603	HUMAN	ENSG00000167984
CAOG_06956	HUMAN	ENSG00000107341
CAOG_02031	HUMAN	ENSG00000186105
CAOG_01502	HUMAN	ENSG00000151025
CAOG_06555	HUMAN	ENSG00000240857
CAOG_06642	HUMAN	ENSG00000099769
CAOG_05418	HUMAN	ENSG00000143512
CAOG_03729	MOUSE	ENSMUSG00000062929
CAOG_06571	HUMAN	ENSG00000139988
CAOG_07732	HUMAN	ENSG00000174501
CAOG_02087	HUMAN	ENSG00000175309
CAOG_07192	HUMAN	ENSG00000099769
CAOG_01607	HUMAN	ENSG00000100206
CAOG_08247	HUMAN	ENSG00000187122
CAOG_05949	HUMAN	ENSG00000197497
CAOG_04404	HUMAN	ENSG00000148053
CAOG_02054	HUMAN	ENSG00000099769
CAOG_08344	HUMAN	ENSG00000106780
CAOG_04470	HUMAN	ENSG00000172757
CAOG_07578	HUMAN	ENSG00000072422
CAOG_06762	HUMAN	ENSG00000263024
CAOG_03987	HUMAN	ENSG00000118402
CAOG_06348	HUMAN	ENSG00000151025
CAOG_06430	HUMAN	ENSG00000016864
CAOG_04976	HUMAN	ENSG00000108528
CAOG_00166	HUMAN	ENSG00000176563
CAOG_08380	HUMAN	ENSG00000164318
CAOG_01773	HUMAN	ENSG00000126215
CAOG_08471	HUMAN	ENSG00000174175
CAOG_06135	HUMAN	ENSG00000107798
CAOG_06822	HUMAN	ENSG00000040608
CAOG_01972	HUMAN	ENSG00000205302
CAOG_06105	HUMAN	ENSG00000082996
CAOG_01969	HUMAN	ENSG00000166224
CAOG_06828	HUMAN	ENSG00000071539
CAOG_06310	HUMAN	ENSG00000148053
CAOG_07542	HUMAN	ENSG00000188906
CAOG_07284	HUMAN	ENSG00000089225
CAOG_02585	HUMAN	ENSG00000130768
CAOG_04544	HUMAN	ENSG00000264820
CAOG_06243	HUMAN	ENSG00000182732
CAOG_08378	HUMAN	ENSG00000105254
CAOG_05365	HUMAN	ENSG00000166839
CAOG_08863	HUMAN	ENSG00000146006
CAOG_06282	MOUSE	ENSMUSG00000028072
CAOG_03089	MOUSE	ENSMUSG00000025272
CAOG_08396	HUMAN	ENSG00000127564
CAOG_02676	HUMAN	ENSG00000147174
CAOG_08915	HUMAN	ENSG00000006695
CAOG_04536	HUMAN	ENSG00000206560
CAOG_00231	HUMAN	ENSG00000116670
CAOG_05844	HUMAN	ENSG00000118420
CAOG_05561	HUMAN	ENSG00000136273
CAOG_07947	HUMAN	ENSG00000161547
CAOG_01970	HUMAN	ENSG00000162733
CAOG_04365	HUMAN	ENSG00000148053
CAOG_04124	HUMAN	ENSG00000112992
CAOG_02108	HUMAN	ENSG00000142875
CAOG_06931	HUMAN	ENSG00000099194
CAOG_06159	HUMAN	ENSG00000163161
CAOG_08367	HUMAN	ENSG00000122008
CAOG_01008	HUMAN	ENSG00000099769
CAOG_05783	MOUSE	ENSMUSG00000059883
CAOG_06120	HUMAN	ENSG00000164182
CAOG_08154	HUMAN	ENSG00000097033
CAOG_08855	HUMAN	ENSG00000136273
CAOG_02494	HUMAN	ENSG00000133216
CAOG_08113	HUMAN	ENSG00000166033
CAOG_04233	HUMAN	ENSG00000119929
CAOG_04620	HUMAN	ENSG00000178772
CAOG_04355	HUMAN	ENSG00000144401
CAOG_04010	HUMAN	ENSG00000115084
CAOG_02790	HUMAN	ENSG00000137094
CAOG_05515	HUMAN	ENSG00000164318
CAOG_08151	HUMAN	ENSG00000027847
CAOG_03222	HUMAN	ENSG00000269336
CAOG_05163	HUMAN	ENSG00000151465
CAOG_07553	HUMAN	ENSG00000206560
CAOG_01122	MOUSE	ENSMUSG00000040331
CAOG_08950	HUMAN	ENSG00000013374
CAOG_02782	HUMAN	ENSG00000268944
CAOG_05169	HUMAN	ENSG00000151465
CAOG_04497	HUMAN	ENSG00000169964
CAOG_02070	HUMAN	ENSG00000157637
CAOG_08074	HUMAN	ENSG00000262887
CAOG_04318	HUMAN	ENSG00000188266
CAOG_00194	HUMAN	ENSG00000077152
CAOG_09010	HUMAN	ENSG00000198739
CAOG_04651	HUMAN	ENSG00000124098
CAOG_08037	HUMAN	ENSG00000197119
CAOG_05204	HUMAN	ENSG00000144136
CAOG_01470	MOUSE	ENSMUSG00000028072
CAOG_02532	HUMAN	ENSG00000166135
CAOG_06821	HUMAN	ENSG00000172061
CAOG_05733	HUMAN	ENSG00000030304
CAOG_06991	HUMAN	ENSG00000097007
CAOG_04445	HUMAN	ENSG00000151353
CAOG_05626	HUMAN	ENSG00000167984
CAOG_06968	HUMAN	ENSG00000135945
CAOG_07484	HUMAN	ENSG00000124659
CAOG_01411	HUMAN	ENSG00000114770
CAOG_03879	HUMAN	ENSG00000175854
CAOG_04627	HUMAN	ENSG00000148400
CAOG_08320	HUMAN	ENSG00000174175
CAOG_05806	HUMAN	ENSG00000092036
CAOG_04288	HUMAN	ENSG00000197579
CAOG_04412	HUMAN	ENSG00000002726
CAOG_04118	HUMAN	ENSG00000108296
CAOG_03354	HUMAN	ENSG00000100483
CAOG_04447	HUMAN	ENSG00000163877
CAOG_05278	HUMAN	ENSG00000169398
CAOG_02931	HUMAN	ENSG00000161513
CAOG_06035	HUMAN	ENSG00000101003
CAOG_05151	HUMAN	ENSG00000112077
CAOG_06022	HUMAN	ENSG00000131470
CAOG_05739	HUMAN	ENSG00000132436
CAOG_04917	HUMAN	ENSG00000186105
CAOG_04120	HUMAN	ENSG00000139350
CAOG_04473	HUMAN	ENSG00000172456
CAOG_05985	HUMAN	ENSG00000171148
CAOG_05755	HUMAN	ENSG00000005700
CAOG_08009	MOUSE	ENSMUSG00000018415
CAOG_08122	HUMAN	ENSG00000158552
CAOG_04476	HUMAN	ENSG00000136877
CAOG_08211	HUMAN	ENSG00000270898
CAOG_06049	HUMAN	ENSG00000074201
CAOG_04557	HUMAN	ENSG00000172061
CAOG_00290	HUMAN	ENSG00000113456
CAOG_06012	HUMAN	ENSG00000163644
CAOG_03970	HUMAN	ENSG00000228716
CAOG_04295	HUMAN	ENSG00000239382
CAOG_08220	HUMAN	ENSG00000144115
CAOG_06107	HUMAN	ENSG00000177225
CAOG_04058	HUMAN	ENSG00000144040
CAOG_01737	HUMAN	ENSG00000033627
CAOG_04477	HUMAN	ENSG00000018610
CAOG_03434	MOUSE	ENSMUSG00000036273
CAOG_05931	HUMAN	ENSG00000156136
CAOG_03975	HUMAN	ENSG00000136492
CAOG_00037	HUMAN	ENSG00000197114
CAOG_05697	HUMAN	ENSG00000142230
CAOG_04105	HUMAN	ENSG00000214367
CAOG_02951	HUMAN	ENSG00000165280
CAOG_05914	MOUSE	ENSMUSG00000055312
CAOG_02605	HUMAN	ENSG00000163644
CAOG_06070	HUMAN	ENSG00000118363
CAOG_03178	HUMAN	ENSG00000198924
CAOG_00001	HUMAN	ENSG00000262515
CAOG_08562	MOUSE	ENSMUSG00000021823
CAOG_09045	HUMAN	ENSG00000148053
CAOG_06021	HUMAN	ENSG00000139428
CAOG_06626	HUMAN	ENSG00000029534
CAOG_00140	HUMAN	ENSG00000261694
CAOG_05514	HUMAN	ENSG00000152910
CAOG_04069	HUMAN	ENSG00000174501
CAOG_06134	HUMAN	ENSG00000131778
CAOG_04246	HUMAN	ENSG00000112419
CAOG_01543	HUMAN	ENSG00000176087
CAOG_06191	MOUSE	ENSMUSG00000044982
CAOG_08072	HUMAN	ENSG00000166111
CAOG_03983	HUMAN	ENSG00000122687
CAOG_05757	HUMAN	ENSG00000196363
CAOG_08920	HUMAN	ENSG00000265570
CAOG_08171	HUMAN	ENSG00000125454
CAOG_04052	HUMAN	ENSG00000154743
CAOG_07079	HUMAN	ENSG00000144182
CAOG_05796	HUMAN	ENSG00000133216
CAOG_08869	HUMAN	ENSG00000109911
CAOG_05936	HUMAN	ENSG00000261911
CAOG_00619	HUMAN	ENSG00000131023
CAOG_03762	HUMAN	ENSG00000105865
CAOG_05158	HUMAN	ENSG00000006831
CAOG_00779	HUMAN	ENSG00000144647
CAOG_08257	HUMAN	ENSG00000143207
CAOG_06147	HUMAN	ENSG00000131470
CAOG_03998	HUMAN	ENSG00000155363
CAOG_06891	HUMAN	ENSG00000197045
CAOG_05850	HUMAN	ENSG00000166484
CAOG_08008	HUMAN	ENSG00000188706
CAOG_04350	MOUSE	ENSMUSG00000030470
CAOG_08273	HUMAN	ENSG00000115828
CAOG_02701	HUMAN	ENSG00000169682
CAOG_04277	HUMAN	ENSG00000123179
CAOG_03088	HUMAN	ENSG00000167619
CAOG_06142	HUMAN	ENSG00000135040
CAOG_03414	HUMAN	ENSG00000116991
CAOG_05952	HUMAN	ENSG00000095321
CAOG_04327	HUMAN	ENSG00000000460
CAOG_08062	HUMAN	ENSG00000099139
CAOG_04376	HUMAN	ENSG00000106628
CAOG_03283	MOUSE	ENSMUSG00000031563
CAOG_08172	HUMAN	ENSG00000185900
CAOG_04943	HUMAN	ENSG00000127995
CAOG_05824	HUMAN	ENSG00000165650
CAOG_03424	HUMAN	ENSG00000063761
CAOG_04296	HUMAN	ENSG00000084110
CAOG_06141	HUMAN	ENSG00000122008
CAOG_04546	HUMAN	ENSG00000135486
CAOG_04271	HUMAN	ENSG00000137168
CAOG_06106	HUMAN	ENSG00000133794
CAOG_08052	MOUSE	ENSMUSG00000054051
CAOG_06936	HUMAN	ENSG00000109814
CAOG_04020	HUMAN	ENSG00000101193
CAOG_08932	HUMAN	ENSG00000169359
CAOG_03823	HUMAN	ENSG00000170653
CAOG_02769	HUMAN	ENSG00000197299
CAOG_06864	HUMAN	ENSG00000177674
CAOG_07593	HUMAN	ENSG00000090857
CAOG_07708	HUMAN	ENSG00000169972
CAOG_03185	HUMAN	ENSG00000099769
CAOG_06056	HUMAN	ENSG00000114021
CAOG_08139	HUMAN	ENSG00000182704
CAOG_05869	HUMAN	ENSG00000179988
CAOG_05584	HUMAN	ENSG00000136444
CAOG_06081	HUMAN	ENSG00000159259
CAOG_08551	HUMAN	ENSG00000136895
CAOG_06185	HUMAN	ENSG00000153930
CAOG_00122	HUMAN	ENSG00000140521
CAOG_04225	HUMAN	ENSG00000198056
CAOG_03609	HUMAN	ENSG00000197119
CAOG_08133	HUMAN	ENSG00000171928
CAOG_03186	HUMAN	ENSG00000099769
CAOG_00347	HUMAN	ENSG00000126814
CAOG_04275	HUMAN	ENSG00000231377
CAOG_05082	HUMAN	ENSG00000117748
CAOG_03275	HUMAN	ENSG00000133835
CAOG_06062	HUMAN	ENSG00000057757
CAOG_01143	HUMAN	ENSG00000131475
CAOG_04682	HUMAN	ENSG00000085999
CAOG_04268	HUMAN	ENSG00000128789
CAOG_04259	HUMAN	ENSG00000263160
CAOG_08321	HUMAN	ENSG00000007908
CAOG_08093	HUMAN	ENSG00000012061
CAOG_02787	HUMAN	ENSG00000223355
CAOG_00451	HUMAN	ENSG00000114120
CAOG_02020	HUMAN	ENSG00000163428
CAOG_03592	HUMAN	ENSG00000123297
CAOG_04030	HUMAN	ENSG00000120837
CAOG_08771	HUMAN	ENSG00000167984
CAOG_04099	HUMAN	ENSG00000262924
CAOG_06043	HUMAN	ENSG00000023041
CAOG_04763	HUMAN	ENSG00000166391
CAOG_06228	HUMAN	ENSG00000174482
CAOG_00422	HUMAN	ENSG00000134909
CAOG_08933	HUMAN	ENSG00000121274
CAOG_04306	HUMAN	ENSG00000143183
CAOG_08816	HUMAN	ENSG00000214941
CAOG_03988	MOUSE	ENSMUSG00000071392
CAOG_04478	HUMAN	ENSG00000133265
CAOG_06040	HUMAN	ENSG00000139197
CAOG_05262	HUMAN	ENSG00000135924
CAOG_04075	HUMAN	ENSG00000122512
CAOG_06403	HUMAN	ENSG00000117228
CAOG_00771	HUMAN	ENSG00000164398
CAOG_00571	HUMAN	ENSG00000141378
CAOG_08057	HUMAN	ENSG00000145740
CAOG_08115	MOUSE	ENSMUSG00000049871
CAOG_05447	HUMAN	ENSG00000183049
CAOG_05958	HUMAN	ENSG00000148053
CAOG_02248	HUMAN	ENSG00000109670
CAOG_05691	HUMAN	ENSG00000154928
CAOG_06161	HUMAN	ENSG00000137642
CAOG_00458	HUMAN	ENSG00000160201
CAOG_06350	HUMAN	ENSG00000261657
CAOG_05761	HUMAN	ENSG00000172061
CAOG_04096	HUMAN	ENSG00000071073
CAOG_05887	HUMAN	ENSG00000068120
CAOG_05942	HUMAN	ENSG00000152684
CAOG_04015	HUMAN	ENSG00000115128
CAOG_00167	HUMAN	ENSG00000141404
CAOG_05685	HUMAN	ENSG00000170430
CAOG_04484	HUMAN	ENSG00000211460
CAOG_05804	HUMAN	ENSG00000168701
CAOG_08034	HUMAN	ENSG00000272467
CAOG_05836	HUMAN	ENSG00000166123
CAOG_02465	HUMAN	ENSG00000198876
CAOG_06176	MOUSE	ENSMUSG00000059883
CAOG_05738	HUMAN	ENSG00000197713
CAOG_05943	HUMAN	ENSG00000166167
CAOG_01028	HUMAN	ENSG00000206481
CAOG_08195	HUMAN	ENSG00000120860
CAOG_05821	HUMAN	ENSG00000131584
CAOG_05907	HUMAN	ENSG00000265808
CAOG_04465	HUMAN	ENSG00000111231
CAOG_04469	HUMAN	ENSG00000116761
CAOG_00838	HUMAN	ENSG00000137996
CAOG_03581	HUMAN	ENSG00000100575
CAOG_06498	HUMAN	ENSG00000086102
CAOG_03926	HUMAN	ENSG00000166111
CAOG_04600	HUMAN	ENSG00000145284
CAOG_06059	HUMAN	ENSG00000263977
CAOG_04479	HUMAN	ENSG00000180198
CAOG_08709	HUMAN	ENSG00000105404
CAOG_08272	HUMAN	ENSG00000171132
CAOG_04101	MOUSE	ENSMUSG00000030612
CAOG_02649	HUMAN	ENSG00000101850
CAOG_07866	HUMAN	ENSG00000198373
CAOG_07407	HUMAN	ENSG00000167264
CAOG_06066	HUMAN	ENSG00000143553
CAOG_04238	HUMAN	ENSG00000175220
CAOG_07515	HUMAN	ENSG00000139974
CAOG_08255	HUMAN	ENSG00000137364
CAOG_07143	HUMAN	ENSG00000012174
CAOG_02255	HUMAN	ENSG00000063761
CAOG_05969	HUMAN	ENSG00000106443
CAOG_05814	HUMAN	ENSG00000142949
CAOG_08939	HUMAN	ENSG00000144233
CAOG_03997	HUMAN	ENSG00000184381
CAOG_03477	HUMAN	ENSG00000115556
CAOG_01584	HUMAN	ENSG00000143198
CAOG_01446	HUMAN	ENSG00000120616
CAOG_07199	HUMAN	ENSG00000121211
CAOG_04346	HUMAN	ENSG00000138760
CAOG_08661	HUMAN	ENSG00000139835
CAOG_02942	HUMAN	ENSG00000006744
CAOG_05946	HUMAN	ENSG00000086598
CAOG_06061	HUMAN	ENSG00000144867
CAOG_05895	HUMAN	ENSG00000114098
CAOG_05325	HUMAN	ENSG00000140538
CAOG_08035	HUMAN	ENSG00000065613
CAOG_08077	HUMAN	ENSG00000113318
CAOG_07071	HUMAN	ENSG00000114993
CAOG_00208	HUMAN	ENSG00000117143
CAOG_01182	HUMAN	ENSG00000076321
CAOG_04291	HUMAN	ENSG00000135847
CAOG_08157	HUMAN	ENSG00000119969
CAOG_00821	HUMAN	ENSG00000146733
CAOG_08275	HUMAN	ENSG00000127481
CAOG_06024	HUMAN	ENSG00000261698
CAOG_00710	HUMAN	ENSG00000100003
CAOG_07280	HUMAN	ENSG00000075391
CAOG_04260	HUMAN	ENSG00000164609
CAOG_08067	HUMAN	ENSG00000177302
CAOG_04068	HUMAN	ENSG00000071073
CAOG_03338	MOUSE	ENSMUSG00000037295
CAOG_01863	HUMAN	ENSG00000133121
CAOG_03722	HUMAN	ENSG00000110090
CAOG_05990	HUMAN	ENSG00000071537
CAOG_02573	HUMAN	ENSG00000017260
CAOG_06047	HUMAN	ENSG00000104823
CAOG_04211	HUMAN	ENSG00000115524
CAOG_07821	HUMAN	ENSG00000154813
CAOG_03025	HUMAN	ENSG00000099769
CAOG_03174	HUMAN	ENSG00000002549
CAOG_03698	HUMAN	ENSG00000165283
CAOG_03852	HUMAN	ENSG00000060237
CAOG_04251	HUMAN	ENSG00000153561
CAOG_07123	HUMAN	ENSG00000107959
CAOG_01752	HUMAN	ENSG00000156968
CAOG_05930	HUMAN	ENSG00000100124
CAOG_04321	HUMAN	ENSG00000178537
CAOG_03584	HUMAN	ENSG00000164199
CAOG_01835	HUMAN	ENSG00000108961
CAOG_00238	HUMAN	ENSG00000081721
CAOG_04247	MOUSE	ENSMUSG00000027130
CAOG_00398	HUMAN	ENSG00000066926
CAOG_06139	HUMAN	ENSG00000177697
CAOG_05182	HUMAN	ENSG00000157326
CAOG_01088	HUMAN	ENSG00000121749
CAOG_05756	MOUSE	ENSMUSG00000059883
CAOG_06706	HUMAN	ENSG00000165688
CAOG_08022	HUMAN	ENSG00000100028
CAOG_05774	HUMAN	ENSG00000085382
CAOG_06419	HUMAN	ENSG00000127838
CAOG_08158	HUMAN	ENSG00000002834
CAOG_04046	HUMAN	ENSG00000097033
CAOG_05886	HUMAN	ENSG00000143772
CAOG_05900	HUMAN	ENSG00000167984
CAOG_04273	HUMAN	ENSG00000130294
CAOG_04290	HUMAN	ENSG00000126062
CAOG_06068	HUMAN	ENSG00000107036
CAOG_05108	MOUSE	ENSMUSG00000019054
CAOG_09183	HUMAN	ENSG00000109919
CAOG_07030	HUMAN	ENSG00000155506
CAOG_01489	HUMAN	ENSG00000072135
CAOG_03091	HUMAN	ENSG00000145476
CAOG_00058	HUMAN	ENSG00000112299
CAOG_01092	HUMAN	ENSG00000123838
CAOG_05828	HUMAN	ENSG00000060982
CAOG_05787	HUMAN	ENSG00000177628
CAOG_08791	HUMAN	ENSG00000100439
CAOG_00123	HUMAN	ENSG00000081760
CAOG_09002	MOUSE	ENSMUSG00000028431
CAOG_05950	HUMAN	ENSG00000106617
CAOG_05209	HUMAN	ENSG00000170445
CAOG_04083	HUMAN	ENSG00000169756
CAOG_05784	HUMAN	ENSG00000119927
CAOG_05072	HUMAN	ENSG00000129474
CAOG_00772	HUMAN	ENSG00000164024
CAOG_07337	HUMAN	ENSG00000130023
CAOG_00059	HUMAN	ENSG00000115556
CAOG_04153	HUMAN	ENSG00000141279
CAOG_04900	HUMAN	ENSG00000072756
CAOG_00377	HUMAN	ENSG00000075413
CAOG_07823	HUMAN	ENSG00000134216
CAOG_06136	HUMAN	ENSG00000189091
CAOG_04004	HUMAN	ENSG00000066583
CAOG_04143	HUMAN	ENSG00000007062
CAOG_07991	HUMAN	ENSG00000108106
CAOG_03162	HUMAN	ENSG00000213782
CAOG_01283	HUMAN	ENSG00000150093
CAOG_03919	HUMAN	ENSG00000145782
CAOG_04397	HUMAN	ENSG00000147010
CAOG_06983	HUMAN	ENSG00000144535
CAOG_01355	HUMAN	ENSG00000171759
CAOG_04252	HUMAN	ENSG00000107651
CAOG_04239	HUMAN	ENSG00000119912
CAOG_04456	HUMAN	ENSG00000183760
CAOG_08070	HUMAN	ENSG00000145113
CAOG_08931	HUMAN	ENSG00000089060
CAOG_06868	HUMAN	ENSG00000143761
CAOG_04282	HUMAN	ENSG00000177565
CAOG_07934	HUMAN	ENSG00000167984
CAOG_00929	HUMAN	ENSG00000089159
CAOG_06211	HUMAN	ENSG00000067225
CAOG_05007	HUMAN	ENSG00000143921
CAOG_08691	HUMAN	ENSG00000143947
CAOG_05763	HUMAN	ENSG00000143653
CAOG_09149	HUMAN	ENSG00000198730
CAOG_00569	HUMAN	ENSG00000114200
CAOG_06169	HUMAN	ENSG00000149485
CAOG_03980	HUMAN	ENSG00000187783
CAOG_05987	HUMAN	ENSG00000127125
CAOG_07939	HUMAN	ENSG00000099204
CAOG_01731	HUMAN	ENSG00000129566
CAOG_08212	HUMAN	ENSG00000154813
CAOG_04084	HUMAN	ENSG00000183386
CAOG_06041	HUMAN	ENSG00000077264
CAOG_05797	HUMAN	ENSG00000267673
CAOG_08746	HUMAN	ENSG00000088386
CAOG_05316	HUMAN	ENSG00000081181
CAOG_04220	HUMAN	ENSG00000130724
CAOG_05893	HUMAN	ENSG00000111596
CAOG_02379	HUMAN	ENSG00000172053
CAOG_01842	HUMAN	ENSG00000101452
CAOG_05781	HUMAN	ENSG00000083937
CAOG_01558	HUMAN	ENSG00000029534
CAOG_08435	MOUSE	ENSMUSG00000049287
CAOG_04148	HUMAN	ENSG00000175426
CAOG_06157	HUMAN	ENSG00000143761
CAOG_07408	HUMAN	ENSG00000214113
CAOG_06060	HUMAN	ENSG00000114859
CAOG_07810	MOUSE	ENSMUSG00000020451
CAOG_03839	HUMAN	ENSG00000132361
CAOG_03740	HUMAN	ENSG00000148400
CAOG_08614	HUMAN	ENSG00000114480
CAOG_05229	HUMAN	ENSG00000237727
CAOG_00147	MOUSE	ENSMUSG00000034450
CAOG_04486	HUMAN	ENSG00000088833
CAOG_05882	HUMAN	ENSG00000105401
CAOG_03947	HUMAN	ENSG00000160688
CAOG_01769	HUMAN	ENSG00000099949
CAOG_01465	HUMAN	ENSG00000186153
CAOG_08041	HUMAN	ENSG00000167984
CAOG_08784	HUMAN	ENSG00000196220
CAOG_06785	HUMAN	ENSG00000106819
CAOG_04008	HUMAN	ENSG00000139132
CAOG_06090	HUMAN	ENSG00000157954
CAOG_03806	HUMAN	ENSG00000070785
CAOG_06905	HUMAN	ENSG00000072110
CAOG_00594	HUMAN	ENSG00000133121
CAOG_08541	HUMAN	ENSG00000182054
CAOG_05560	HUMAN	ENSG00000051180
CAOG_04071	HUMAN	ENSG00000173540
CAOG_05951	HUMAN	ENSG00000182446
CAOG_05760	HUMAN	ENSG00000136240
CAOG_02327	HUMAN	ENSG00000145555
CAOG_02582	HUMAN	ENSG00000167193
CAOG_00135	HUMAN	ENSG00000075303
CAOG_06119	HUMAN	ENSG00000141580
CAOG_01009	HUMAN	ENSG00000107959
CAOG_01179	HUMAN	ENSG00000166311
CAOG_00029	HUMAN	ENSG00000135002
CAOG_06000	HUMAN	ENSG00000123119
CAOG_05899	HUMAN	ENSG00000242247
CAOG_00165	HUMAN	ENSG00000133424
CAOG_06832	HUMAN	ENSG00000008256
CAOG_05060	HUMAN	ENSG00000100226
CAOG_08027	HUMAN	ENSG00000198650
CAOG_08244	HUMAN	ENSG00000136928
CAOG_01596	HUMAN	ENSG00000262907
CAOG_05557	HUMAN	ENSG00000176986
CAOG_03471	HUMAN	ENSG00000173214
CAOG_07736	HUMAN	ENSG00000119718
CAOG_07328	HUMAN	ENSG00000110619
CAOG_03552	HUMAN	ENSG00000099769
CAOG_04690	HUMAN	ENSG00000188906
CAOG_06379	HUMAN	ENSG00000169084
CAOG_04501	HUMAN	ENSG00000157483
CAOG_06175	HUMAN	ENSG00000183760
CAOG_08182	HUMAN	ENSG00000080371
CAOG_05917	HUMAN	ENSG00000099341
CAOG_02685	HUMAN	ENSG00000070669
CAOG_03516	HUMAN	ENSG00000188229
CAOG_05747	HUMAN	ENSG00000127831
CAOG_05216	HUMAN	ENSG00000126858
CAOG_03878	MOUSE	ENSMUSG00000028811
CAOG_00998	HUMAN	ENSG00000120053
CAOG_06194	HUMAN	ENSG00000090661
CAOG_07648	HUMAN	ENSG00000176658
CAOG_05944	HUMAN	ENSG00000162819
CAOG_05404	MOUSE	ENSMUSG00000032131
CAOG_06354	HUMAN	ENSG00000064601
CAOG_02144	HUMAN	ENSG00000014257
CAOG_03887	HUMAN	ENSG00000115211
CAOG_05117	HUMAN	ENSG00000148606
CAOG_05956	HUMAN	ENSG00000072110
CAOG_05890	HUMAN	ENSG00000185627
CAOG_00493	HUMAN	ENSG00000145191
CAOG_04415	HUMAN	ENSG00000144579
CAOG_04095	HUMAN	ENSG00000112062
CAOG_01265	HUMAN	ENSG00000178772
CAOG_08228	HUMAN	ENSG00000125166
CAOG_04854	MOUSE	ENSMUSG00000020354
CAOG_05957	HUMAN	ENSG00000197415
CAOG_03658	HUMAN	ENSG00000031698
CAOG_03292	HUMAN	ENSG00000103485
CAOG_07786	HUMAN	ENSG00000161048
CAOG_04699	HUMAN	ENSG00000167085
CAOG_00531	HUMAN	ENSG00000264606
CAOG_06796	HUMAN	ENSG00000240849
CAOG_00711	HUMAN	ENSG00000165794
CAOG_04051	HUMAN	ENSG00000119321
CAOG_04455	HUMAN	ENSG00000136854
CAOG_02153	HUMAN	ENSG00000198380
CAOG_06401	HUMAN	ENSG00000157326
CAOG_05724	HUMAN	ENSG00000124574
CAOG_06187	HUMAN	ENSG00000115159
CAOG_04303	HUMAN	ENSG00000175416
CAOG_08084	HUMAN	ENSG00000104375
CAOG_02714	HUMAN	ENSG00000134440
CAOG_07657	HUMAN	ENSG00000185432
CAOG_02875	HUMAN	ENSG00000159176
CAOG_02609	HUMAN	ENSG00000082898
CAOG_00021	HUMAN	ENSG00000162600
CAOG_02039	HUMAN	ENSG00000165280
CAOG_00919	HUMAN	ENSG00000269079
CAOG_04171	HUMAN	ENSG00000109971
CAOG_04121	HUMAN	ENSG00000151239
CAOG_04509	HUMAN	ENSG00000135047
CAOG_05336	HUMAN	ENSG00000110911
CAOG_04810	HUMAN	ENSG00000118777
CAOG_02793	HUMAN	ENSG00000183760
CAOG_03466	HUMAN	ENSG00000107331
CAOG_03820	HUMAN	ENSG00000157326
CAOG_00869	HUMAN	ENSG00000132432
CAOG_03095	HUMAN	ENSG00000134321
CAOG_05395	HUMAN	ENSG00000123405
CAOG_02719	HUMAN	ENSG00000157483
CAOG_01021	HUMAN	ENSG00000136167
CAOG_05911	HUMAN	ENSG00000119782
CAOG_02542	HUMAN	ENSG00000134001
CAOG_00286	HUMAN	ENSG00000021645
CAOG_08493	HUMAN	ENSG00000100934
CAOG_04033	HUMAN	ENSG00000181789
CAOG_06368	HUMAN	ENSG00000110090
CAOG_04145	HUMAN	ENSG00000271325
CAOG_08407	HUMAN	ENSG00000137877
CAOG_04169	HUMAN	ENSG00000198668
CAOG_03695	HUMAN	ENSG00000173821
CAOG_08250	HUMAN	ENSG00000008282
CAOG_03230	HUMAN	ENSG00000167588
CAOG_04909	HUMAN	ENSG00000260245
CAOG_01632	HUMAN	ENSG00000077150
CAOG_06050	HUMAN	ENSG00000189007
CAOG_04081	HUMAN	ENSG00000116489
CAOG_03100	HUMAN	ENSG00000183760
CAOG_01055	HUMAN	ENSG00000158417
CAOG_00873	HUMAN	ENSG00000086289
CAOG_05058	HUMAN	ENSG00000198542
CAOG_05815	HUMAN	ENSG00000172164
CAOG_02509	HUMAN	ENSG00000122729
CAOG_05734	HUMAN	ENSG00000101680
CAOG_06153	MOUSE	ENSMUSG00000031948
CAOG_06570	HUMAN	ENSG00000143322
CAOG_01785	HUMAN	ENSG00000124120
CAOG_01087	HUMAN	ENSG00000174175
CAOG_01908	HUMAN	ENSG00000124201
CAOG_02955	HUMAN	ENSG00000085563
CAOG_04021	HUMAN	ENSG00000128641
CAOG_02785	HUMAN	ENSG00000113407
CAOG_07452	HUMAN	ENSG00000117984
CAOG_04711	HUMAN	ENSG00000130741
CAOG_04329	HUMAN	ENSG00000174448
CAOG_06421	HUMAN	ENSG00000172350
CAOG_06150	HUMAN	ENSG00000049245
CAOG_05752	HUMAN	ENSG00000261843
CAOG_06168	HUMAN	ENSG00000183760
CAOG_06586	HUMAN	ENSG00000136167
CAOG_03219	HUMAN	ENSG00000085563
CAOG_05996	HUMAN	ENSG00000119541
CAOG_05017	HUMAN	ENSG00000113013
CAOG_05898	HUMAN	ENSG00000162409
CAOG_08019	HUMAN	ENSG00000185624
CAOG_02860	HUMAN	ENSG00000107331
CAOG_08253	HUMAN	ENSG00000124614
CAOG_03619	HUMAN	ENSG00000102385
CAOG_02771	HUMAN	ENSG00000143549
CAOG_07467	HUMAN	ENSG00000198668
CAOG_06424	HUMAN	ENSG00000013364
CAOG_06517	HUMAN	ENSG00000196305
CAOG_06018	MOUSE	ENSMUSG00000029580
CAOG_08047	HUMAN	ENSG00000111348
CAOG_06847	HUMAN	ENSG00000127831
CAOG_04930	HUMAN	ENSG00000143921
CAOG_03195	HUMAN	ENSG00000023445
CAOG_01932	HUMAN	ENSG00000104375
CAOG_03039	HUMAN	ENSG00000174437
CAOG_03985	HUMAN	ENSG00000158516
CAOG_05764	HUMAN	ENSG00000126267
CAOG_07972	HUMAN	ENSG00000172350
CAOG_01304	HUMAN	ENSG00000144848
CAOG_04454	HUMAN	ENSG00000111229
CAOG_03522	HUMAN	ENSG00000099139
CAOG_08160	HUMAN	ENSG00000164733
CAOG_02752	HUMAN	ENSG00000140575
CAOG_08251	HUMAN	ENSG00000183760
CAOG_00154	HUMAN	ENSG00000268767
CAOG_03939	HUMAN	ENSG00000133026
CAOG_04192	HUMAN	ENSG00000109971
CAOG_05933	HUMAN	ENSG00000170315
CAOG_04009	HUMAN	ENSG00000117592
CAOG_06031	HUMAN	ENSG00000110700
CAOG_00182	HUMAN	ENSG00000085563
CAOG_05351	MOUSE	ENSMUSG00000026616
CAOG_08243	HUMAN	ENSG00000107789
CAOG_05252	HUMAN	ENSG00000250305
CAOG_08208	HUMAN	ENSG00000057252
CAOG_08132	HUMAN	ENSG00000166340
CAOG_07589	HUMAN	ENSG00000142168
CAOG_05989	HUMAN	ENSG00000177600
CAOG_05350	HUMAN	ENSG00000145794
CAOG_06675	HUMAN	ENSG00000183760
CAOG_07313	HUMAN	ENSG00000107537
CAOG_03873	HUMAN	ENSG00000085511
CAOG_02483	HUMAN	ENSG00000143921
CAOG_02694	HUMAN	ENSG00000198668
CAOG_00006	MOUSE	ENSMUSG00000034687
