# Supplementary material for: Genome editing in the unicellular holozoan Capsaspora owczarzaki suggests a premetazoan role for the Hippo pathway in multicellular morphogenesis
Source: eLife. 2022 Jun 6;11:e77598. doi: 10.7554/eLife.77598 (PMC9170242; doi:10.7554/eLife.77598)
Supplement: Supplementary file 5. [file elife-77598-supp5.xlsx]

## Sheet: Sheet1
synthesized DNA number	synthesized DNA description	sequence	Notes
sJP1	Capaspora EF1-α promoter and terminator driving expression of mScarlet codon-optimized for expression in Capsaspora	CCCGGGGCCGGCAAATGCACAGTTAGCAACGACCGACAATCAGCAACCTCCAAACTCTCAGTTTTTTTCCCCCAATCGTTGTCGATTTAGCTTTTGATGCTGCATTTTGAAATAGAACGACAACCGAATTTGGGAGAGAGCACTCTTTTACAGGTTTGTGAAAAGAAAAAAAATCGAACGTGACTTGCTTCCATCTTCCTTCTCGAAGCCGATCTCGGCCCATCCCCGCTTGTCCCCTCCTCCCCTCCTCGCAATCCGCTAGACAGTGTCTCTGCACACTGGATTGCGGTGCGCGGGCCATCCGATGCCCCTTTCCTCGGCCTGGAGATGGACGTGAAAGTGGAAAACGAAAAACGCGAAACAGAAACATGTGGTTCTTTTTTTTTTCTTTTTCTTTTT…	inserted at EcoRI site of pUC57-mini to create pJP72
sJP2	Capsaspora actin promoter and terminator driving expression of NeoR (Geneticin resistance) gene codon-optimized for expression in Capsaspora	tgacgtcccaatgatcccACAAAAATGCTGATTGTTTGTTTTTTTCCACTGCGGCTTGCCATCTTTGGAAACCGCAGTCAACAAACAGGTTTTTCAGGTCAAACTGCCATGGCAGACTGACCTGAAATCGTGCTGCGACCCGCTGGGGGTATTTAAGGCGGCCCGTTTTGGACGAGTTTCAGATCAGTCTTTTAACCTAGTTAAATCCCACCAACCCACCAAAATGGATGGTGAAGATGTTCAAGCTGGCTCGTTTCGCATGATTGAACAAGATGGCCTCCACGCCGGTTCGCCCGCCGCTTGGGTCGAGCGCCTCTTCGGCTACGACTGGGCCCAACAGACCATCGGCTGCTCGGATGCCGCCGTCTTCCGCCTGTCGGCCCAGGGCCGCCCCGTTCT…	contains homologous arms for gibson assmbly into SmaI site of pJP72
sJP3	Capsaspora actin promoter and terminator driving expression of nourseothricin acetyltransferase codon-optimized for expression in Capsaspora	tgacgtcccaatgatcccACAAAAATGCTGATTGTTTGTTTTTTTCCACTGCGGCTTGCCATCTTTGGAAACCGCAGTCAACAAACAGGTTTTTCAGGTCAAACTGCCATGGCAGACTGACCTGAAATCGTGCTGCGACCCGCTGGGGGTATTTAAGGCGGCCCGTTTTGGACGAGTTTCAGATCAGTCTTTTAACCTAGTTAAATCCCACCAACCCACCAAAATGGGTACCACTCTCGACGACACCGCTTACCGTTACCGCACCTCGGTCCCCGGCGACGCCGAAGCCATCGAGGCTCTGGATGGCTCTTTCACCACCGACACCGTTTTCCGCGTCACTGCCACCGGCGACGGCTTTACCCTGCGTGAGGTCCCCGTTGACCCCCCCCTGACCAAGGT…	contains homologous arms for gibson assmbly into SmaI site of pJP72
sJP4	Capsaspora actin promoter and terminator driving expression of hygromycin B phosphotransferase codon-optimized for expression in Capsaspora	tgacgtcccaatgatcccACAAAAATGCTGATTGTTTGTTTTTTTCCACTGCGGCTTGCCATCTTTGGAAACCGCAGTCAACAAACAGGTTTTTCAGGTCAAACTGCCATGGCAGACTGACCTGAAATCGTGCTGCGACCCGCTGGGGGTATTTAAGGCGGCCCGTTTTGGACGAGTTTCAGATCAGTCTTTTAACCTAGTTAAATCCCACCAACCCACCAAAATGAAGAAGCCCGAACTCACCGCCACCTCGGTCGAGAAGTTTCTGATCGAAAAGTTCGACTCGGTCTCCGACCTGATGCAGCTCTCGGAGGGCGAAGAATCGCGTGCTTTCTCGTTCGATGTCGGCGGCCGTGGCTACGTCCTGCGCGTCAACTCGTGCGCCGATGGTTTCTACAA…	contains homologous arms for gibson assmbly into SmaI site of pJP72
sJP5	ORF encoding Capsaspora Yorkie ortholog CAOG_07866 with synonymous codon changes to reduce homology with the endogenous Capaspora Yorkie gene	gacgagctgtacaagaagtctggcggctcgggcggctcgATGCAGCAGCAACAGCAACAGCAGTCGCAGCAGTCGCAGCTCCAACACCACCCCCACTCCCACAATTCCCTGTACTCCCTCTCCCAGTCCTCGCACTCCCAGCCCCACTCGCGCCACTCGTCGATGCACGTCCGCGAGTCGTCGATGGACTCGGTCTCGTCCGCCTCGCAGCACGGCTCGGGCGAATACCTCGCCATGGACACCACCGGTCGCGGCTCGACCGTCGACCCCCTCTACGCCCCCGTCCTCCCCCACAACCGCTCCCAGTCGGAGTCGAACCAGTATCACATTTCGCAGCCCTCCCTGGACTCCCTGCACTCGACCCTGTCGATGCCCCCCCTCCGCGACCGCAATCTCCCC…	contains homologous arms for Gibson assembly into the AflII site of pJP72.
sJP6	Lifeact peptide codon-optimized for expression in Capsaspora	CAGAACAACCTTCACAACTAGTGGTACATGGGCGTGGCCGACCTCATCAAGAAGTTCGAGTCCATCTCCAAGGAGGAGGGCGATCCCCCGGTCGCCACCGGTACCATGGTCTCGAAGGGCGAGGCCG	contains homologous arms for Gibson assembly into KpnI site of pJP103
